# Supplementary material for: Membrane binding controls ordered self-assembly of animal septins
Source: eLife journal article supplement (doi:10.7554/elife.63349), 2021-04-13
Supplement: supp [file elife-63349-supp-v1.zip]

Archive with 18 entries (18 files):
- elife_poa_e63349_Transparent_Reporting_File.pdf
- elife_poa_e63349_Figure_4_video_1.avi
- elife_poa_e63349_Figure_1_figure_supplement_1.pdf
- elife_poa_e63349_Figure_1_figure_supplement_2.pdf
- elife_poa_e63349_Figure_2_figure_supplement_1.pdf
- elife_poa_e63349_Figure_2_figure_supplement_2.pdf
- elife_poa_e63349_Figure_3_figure_supplement_1.pdf
- elife_poa_e63349_Figure_3_figure_supplement_2.pdf
- elife_poa_e63349_Figure_4_figure_supplement_1.pdf
- elife_poa_e63349_Figure_4_figure_supplement_2.pdf
- elife_poa_e63349_Figure_4_figure_supplement_3.pdf
- elife_poa_e63349_Figure_5_figure_supplement_1.pdf
- elife_poa_e63349_Figure_5_figure_supplement_2.pdf
- elife_poa_e63349_Figure_5_figure_supplement_3.pdf
- elife_poa_e63349_Figure_5_figure_supplement_4.pdf
- elife_poa_e63349_Figure_7_figure_supplement_1.pdf
- elife_poa_e63349_Figure_7_figure_supplement_2.pdf
- elife_poa_e63349_Figure_8_figure_supplement_1.pdf
