# Supplementary figures and images for: Membrane binding controls ordered self-assembly of animal septins
Source: eLife journal article supplement (doi:10.7554/elife.63349), 2021-04-13

12 nM

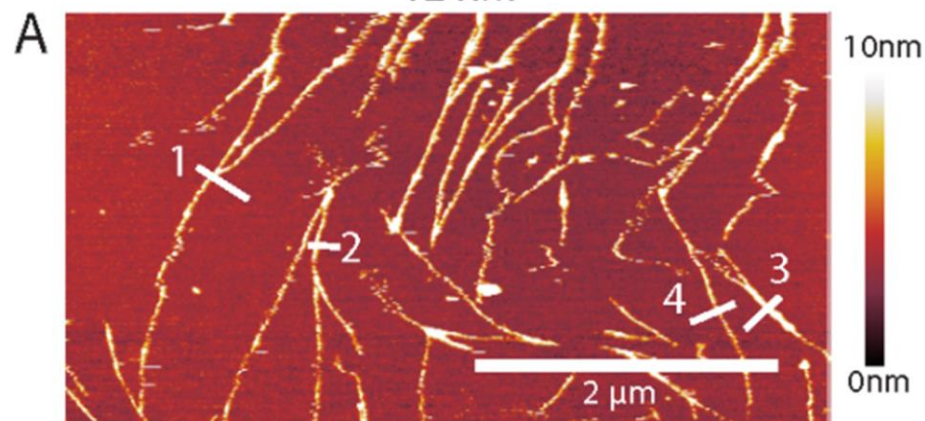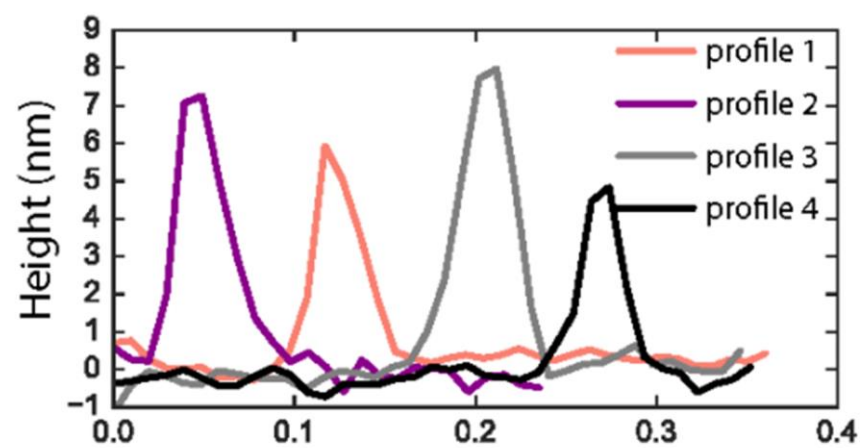

24 nM

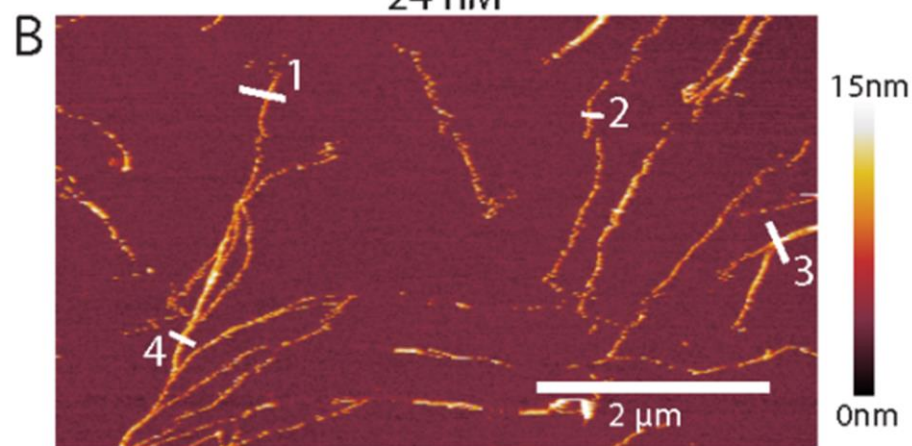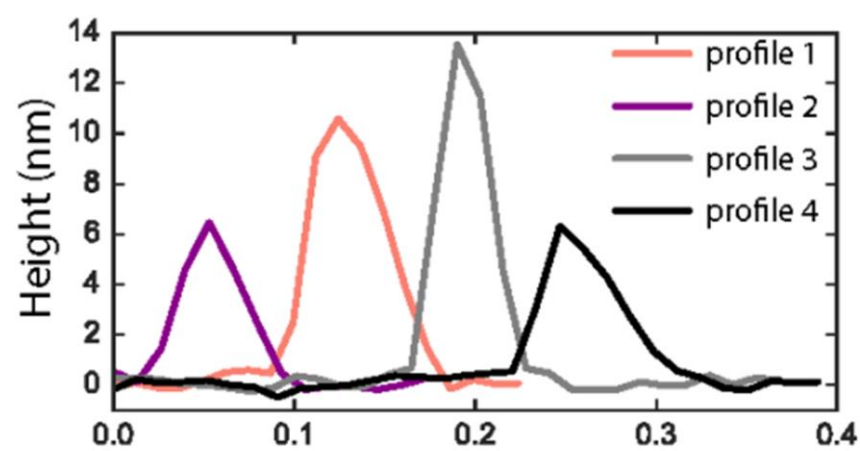

60 nM

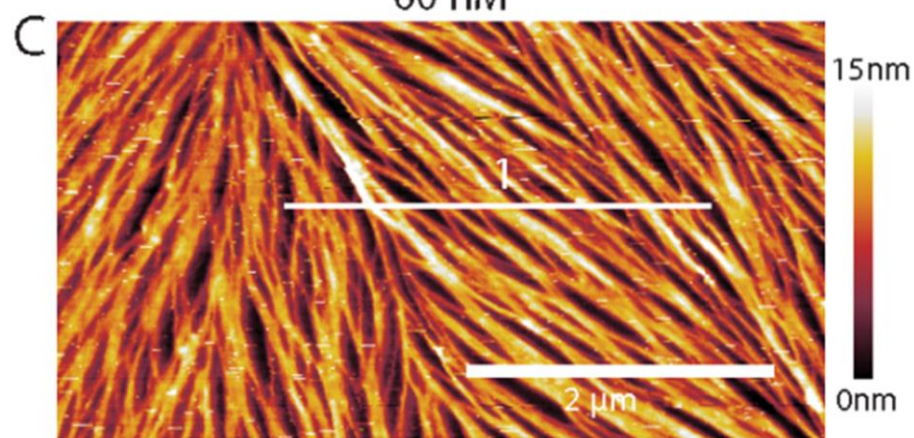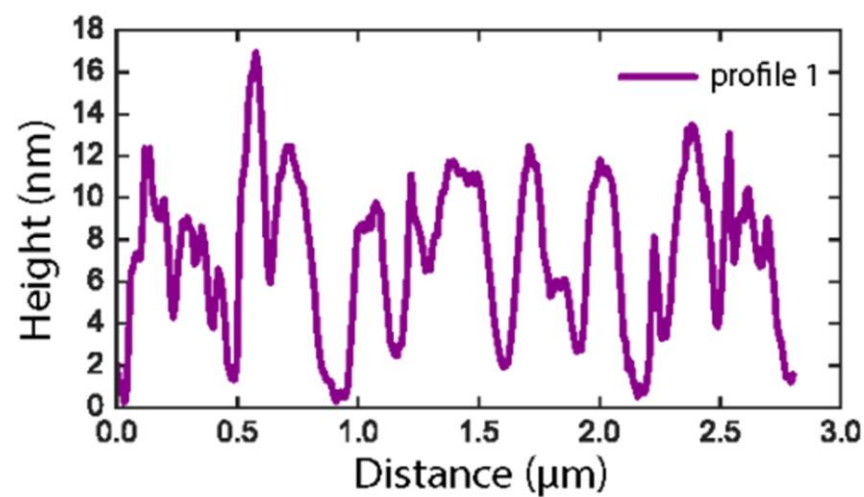

Supplement: supp [file elife-63349-supp-v1.zip]

A

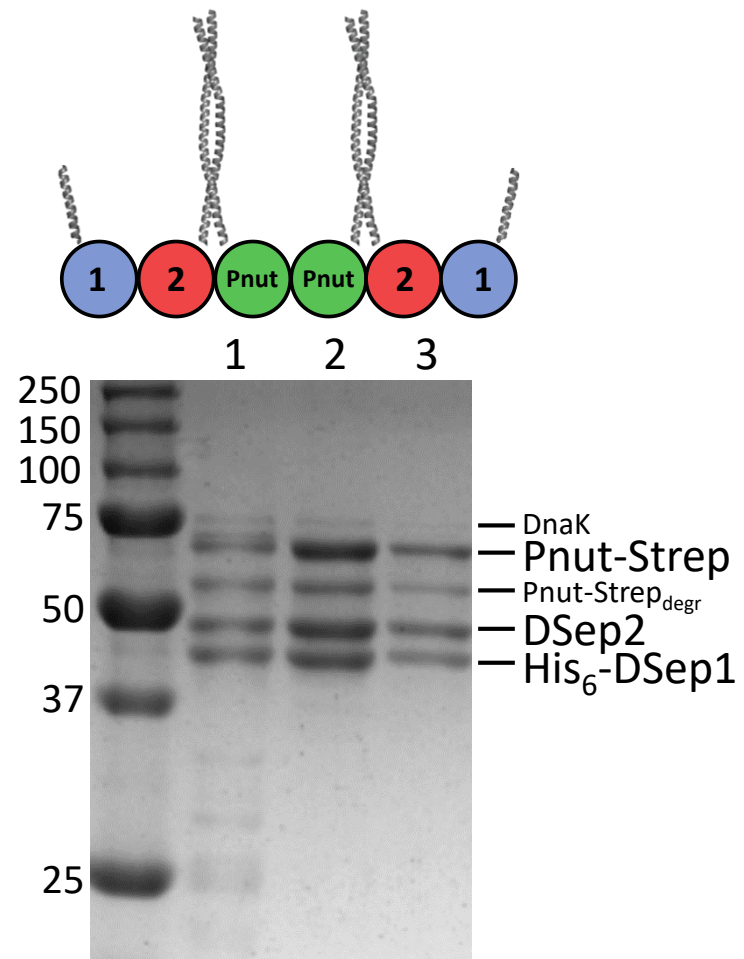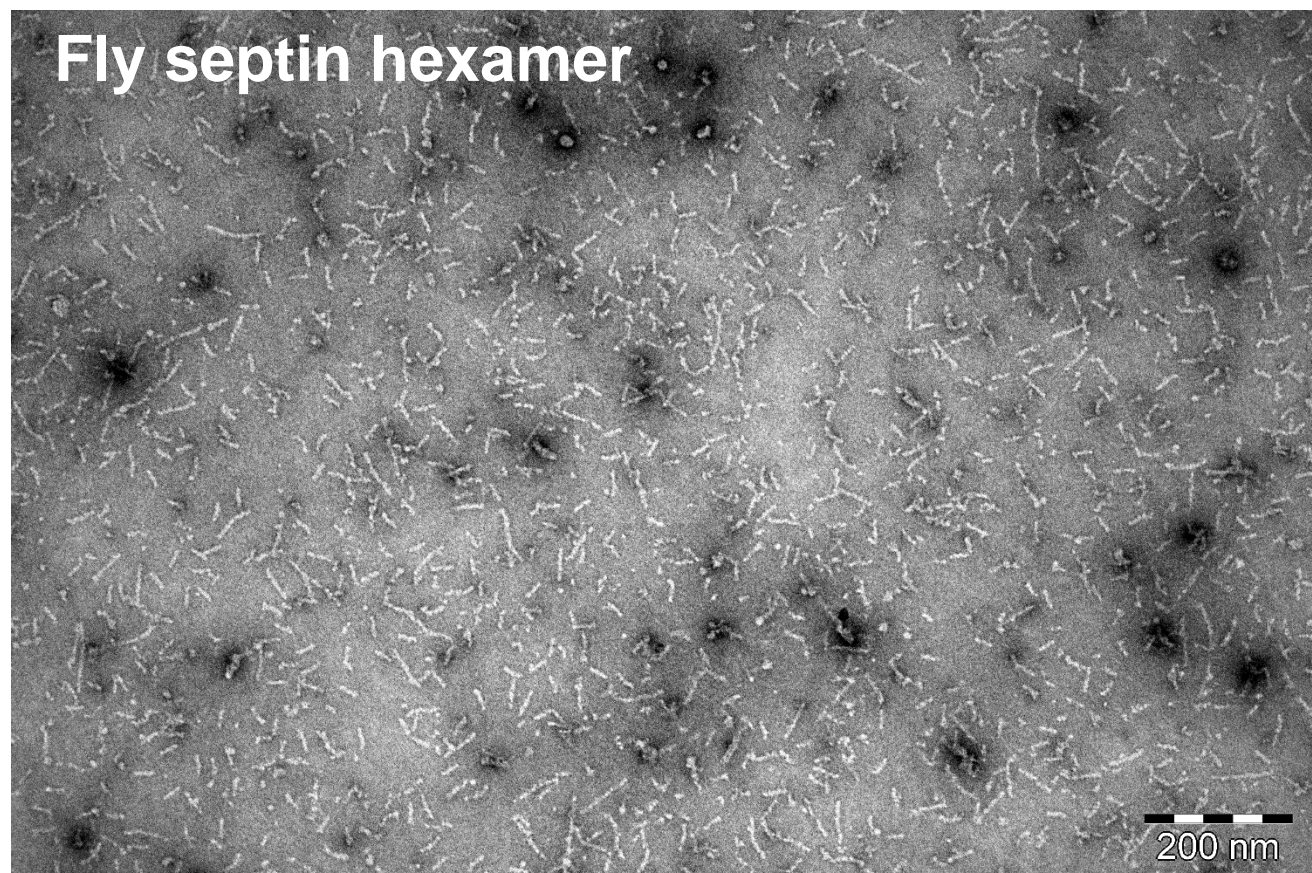

B

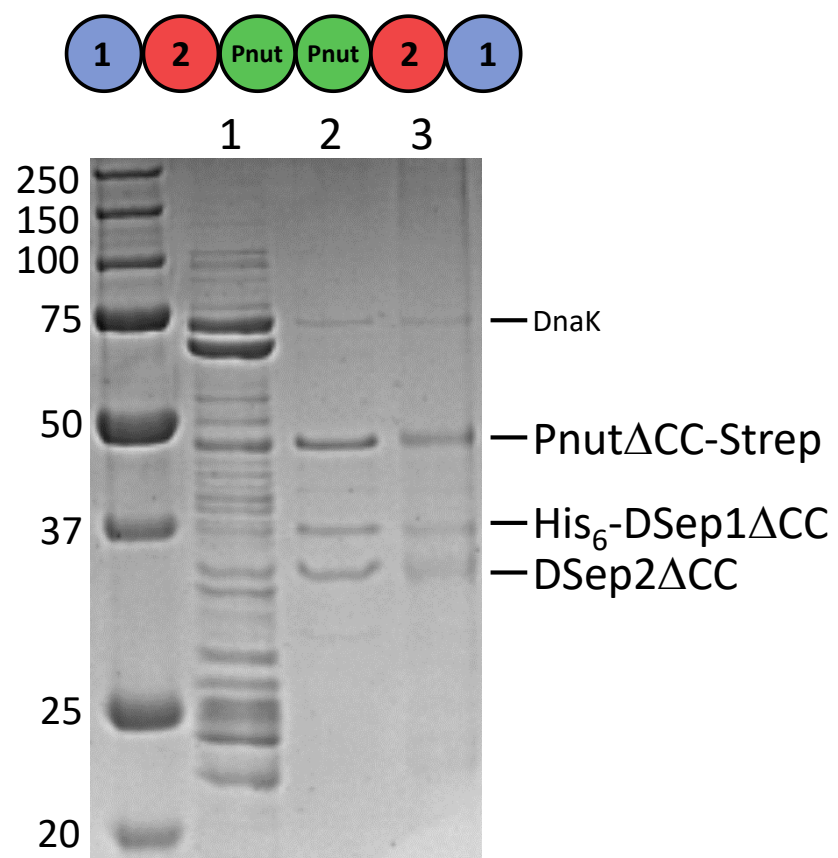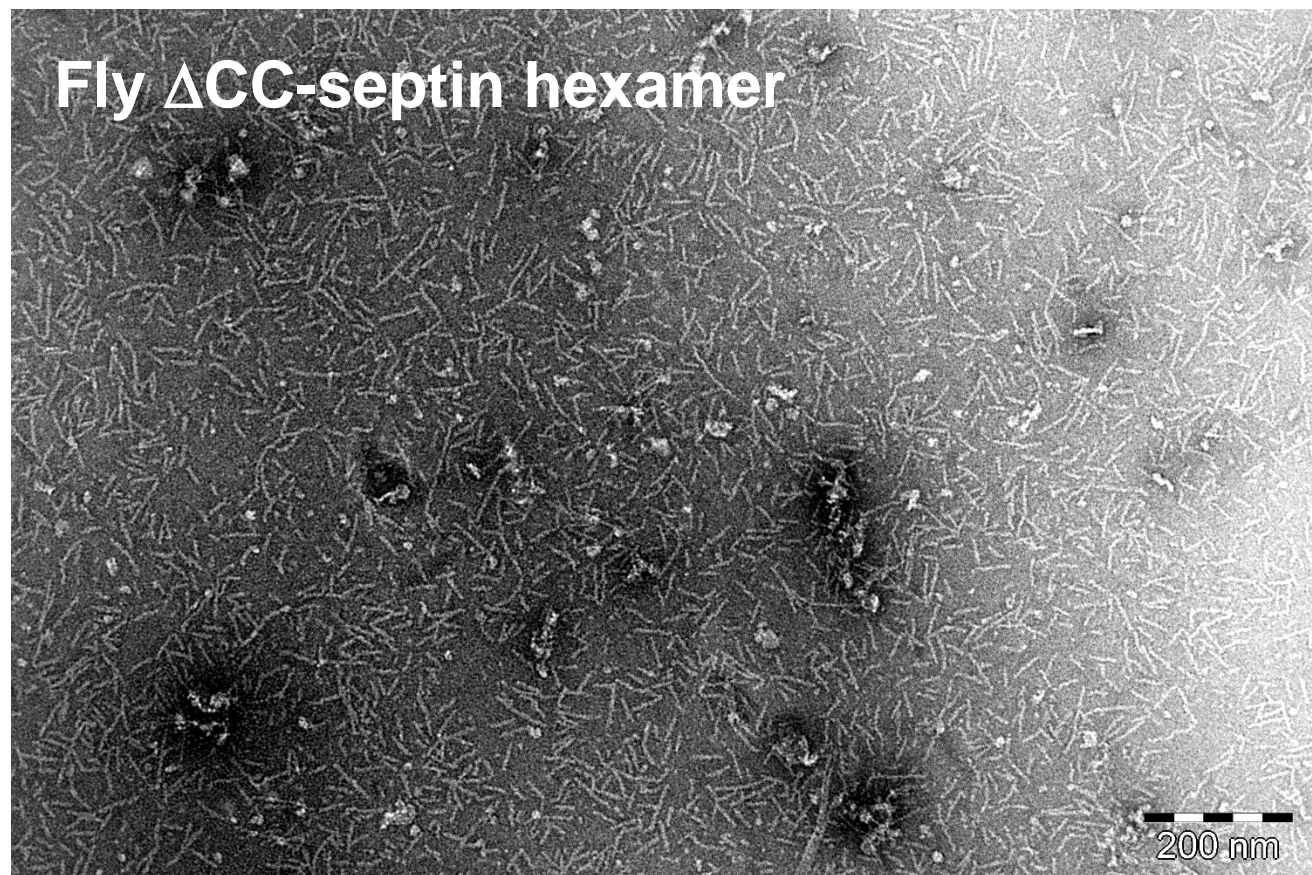

Supplement: supp [file elife-63349-supp-v1.zip › elife_poa_e63349_Figure_1_figure_supplement_1.pdf]

A

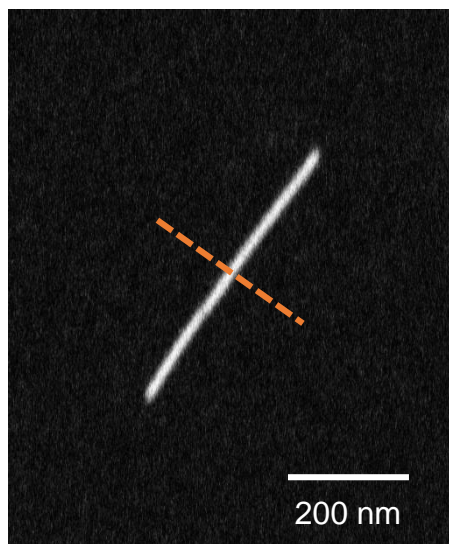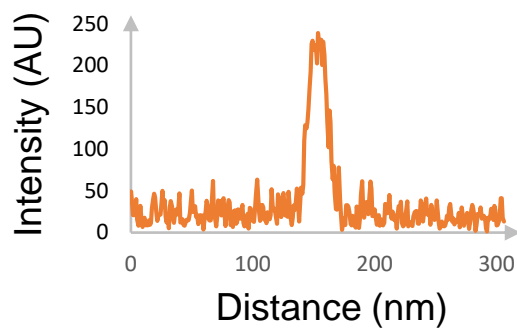

B

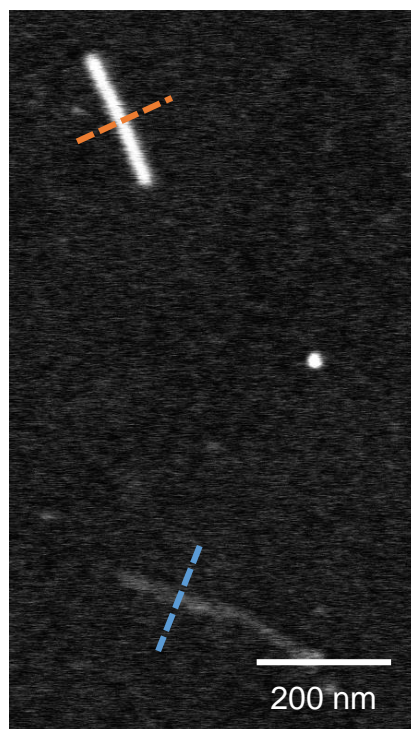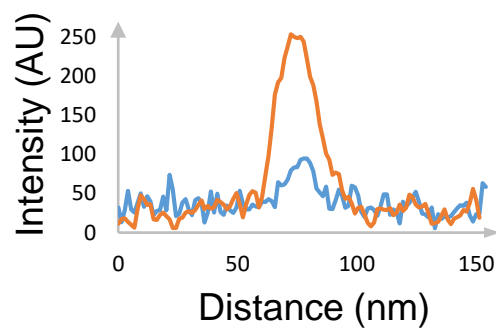

C

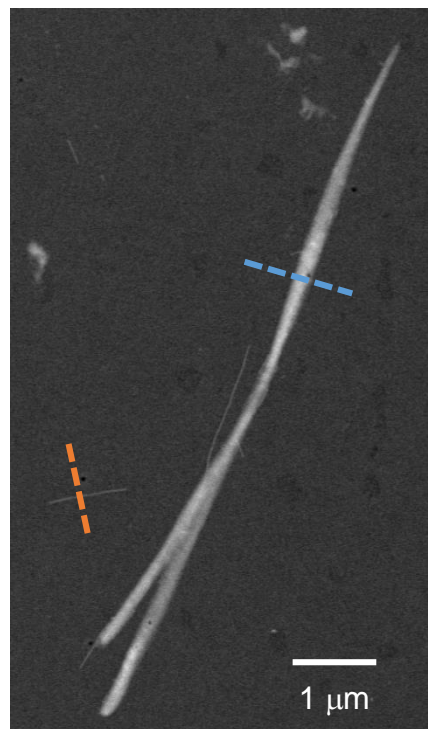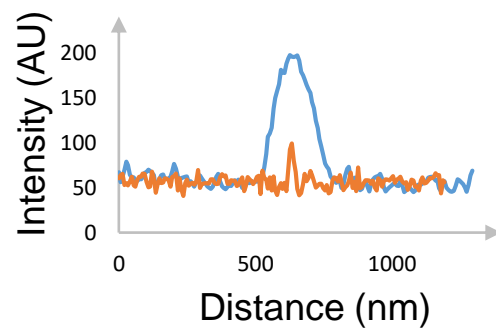

D

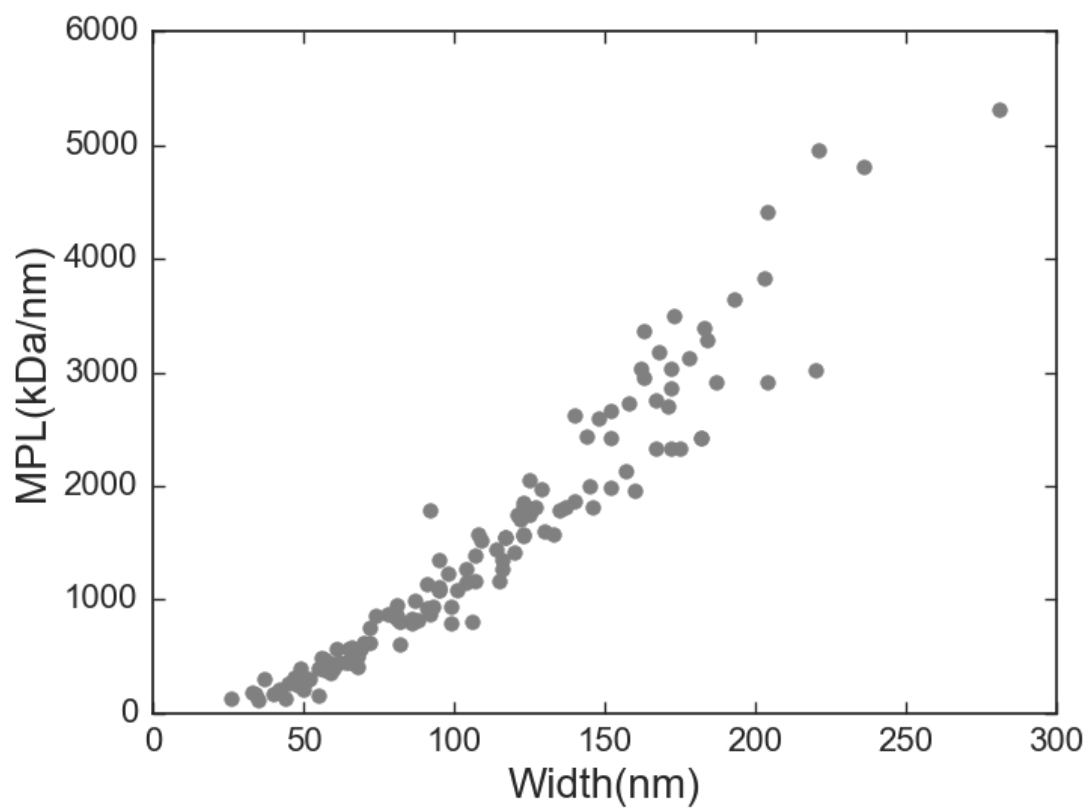

Supplement: supp [file elife-63349-supp-v1.zip › elife_poa_e63349_Figure_1_figure_supplement_2.pdf]

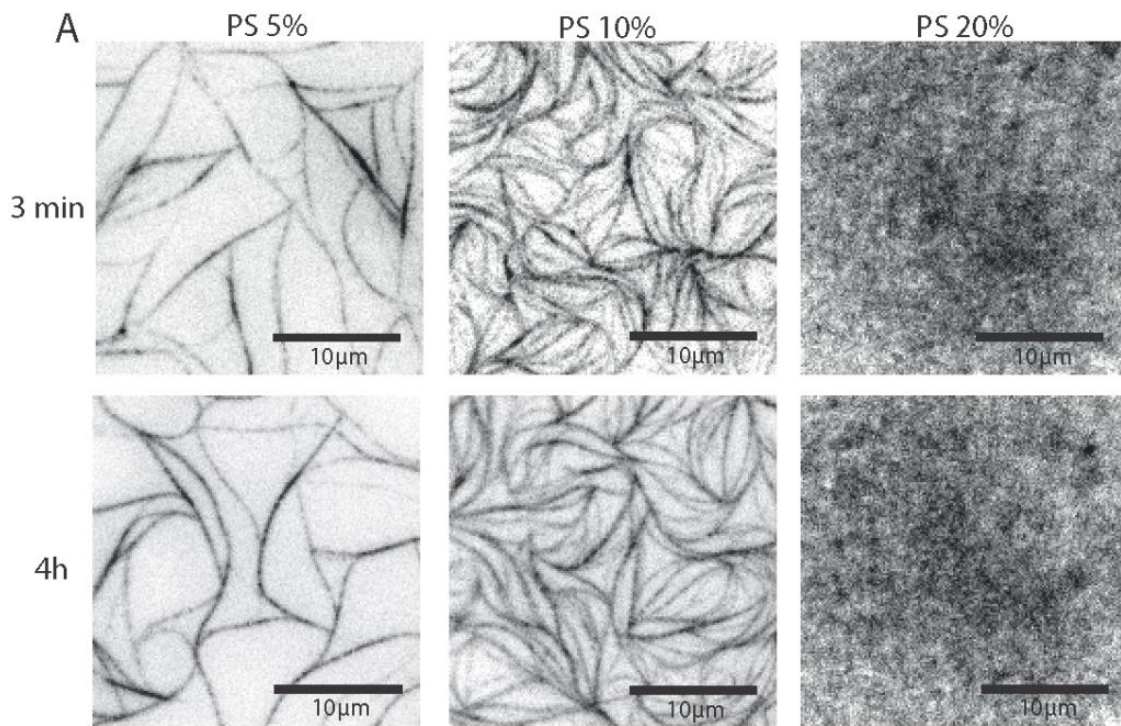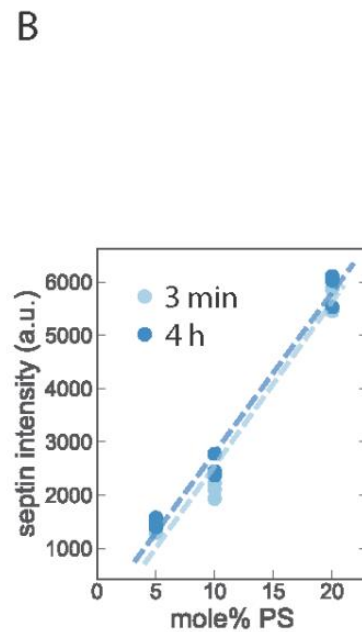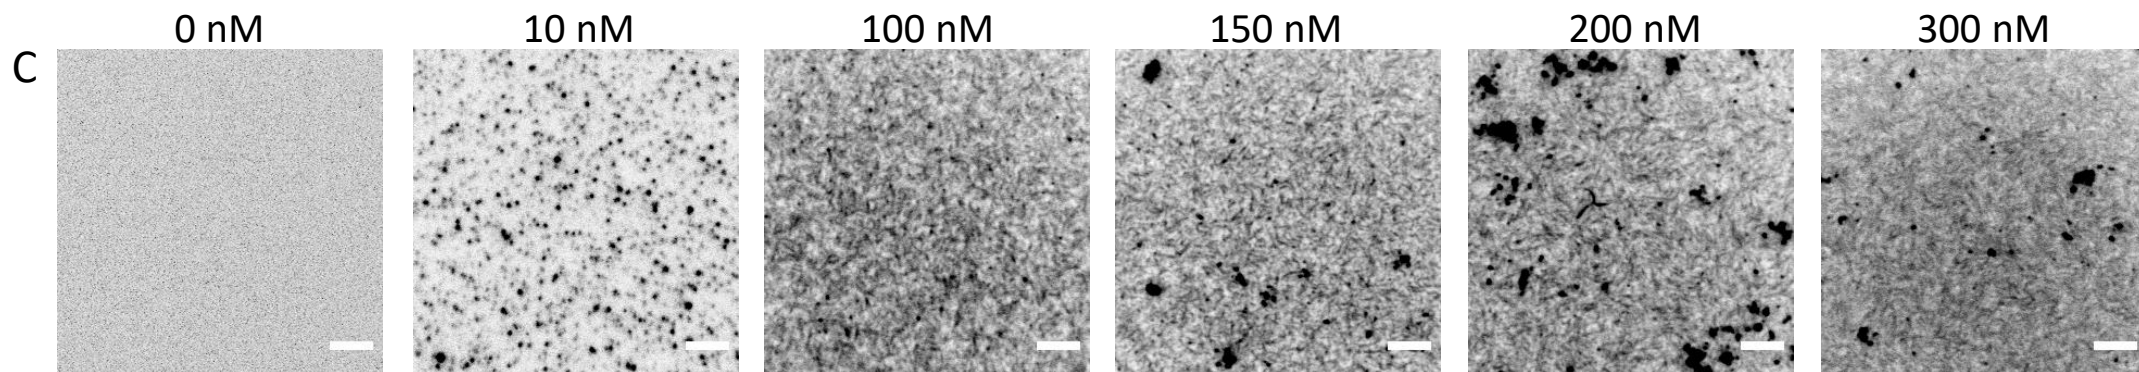

Supplement: supp [file elife-63349-supp-v1.zip › elife_poa_e63349_Figure_2_figure_supplement_1.pdf]

before bleaching  
 $t=-12s$

moment of bleaching  
 $t=0s$

after bleaching  
 $t=60s$

after bleaching  
 $t=440s$

A

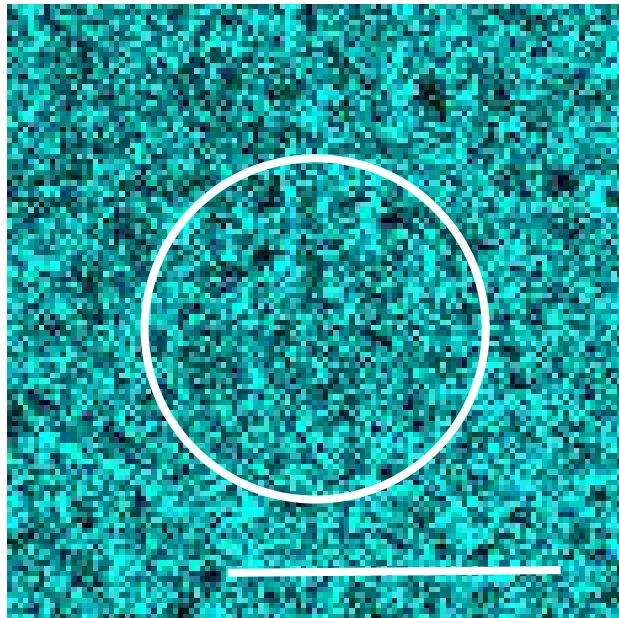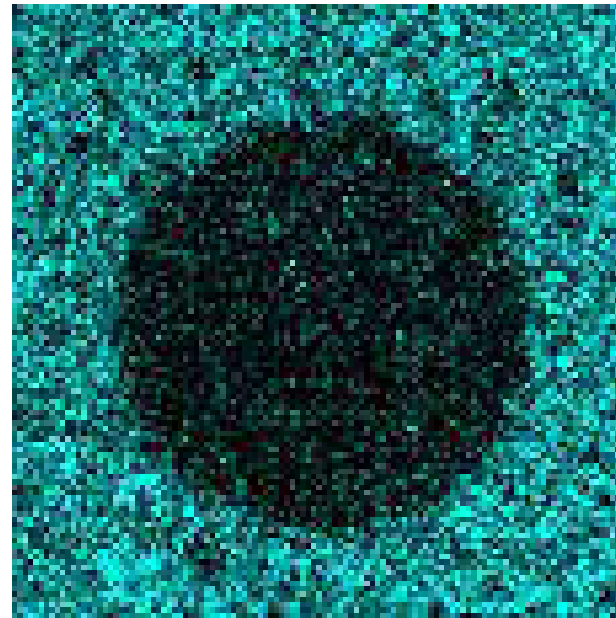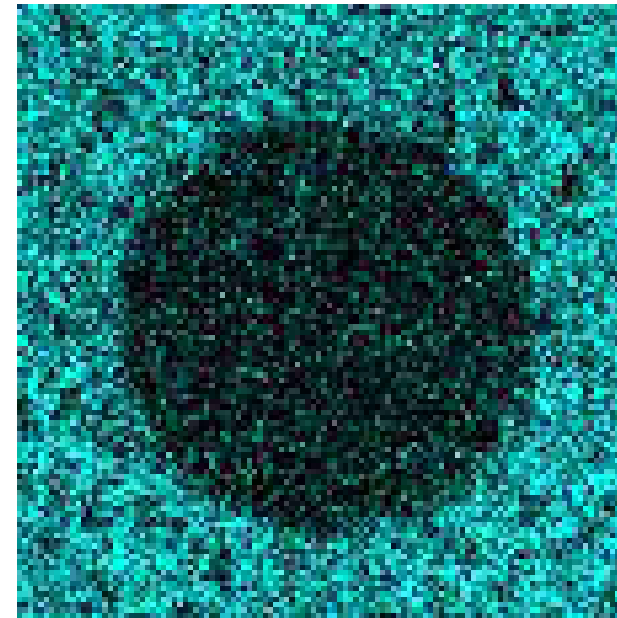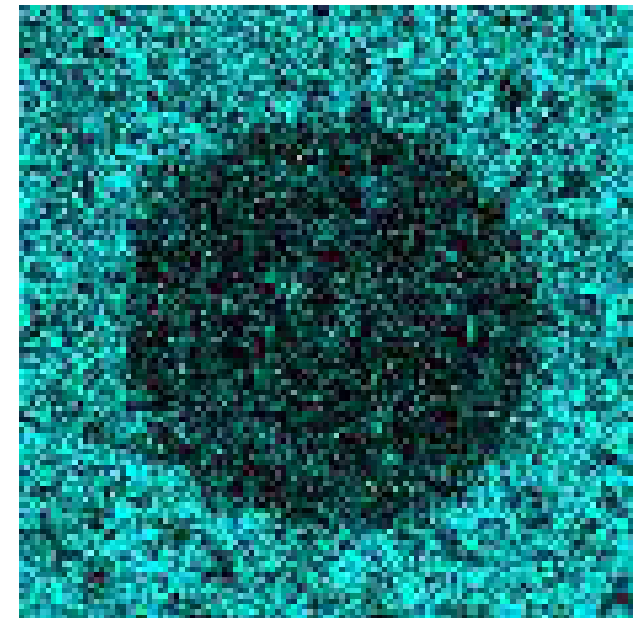

B

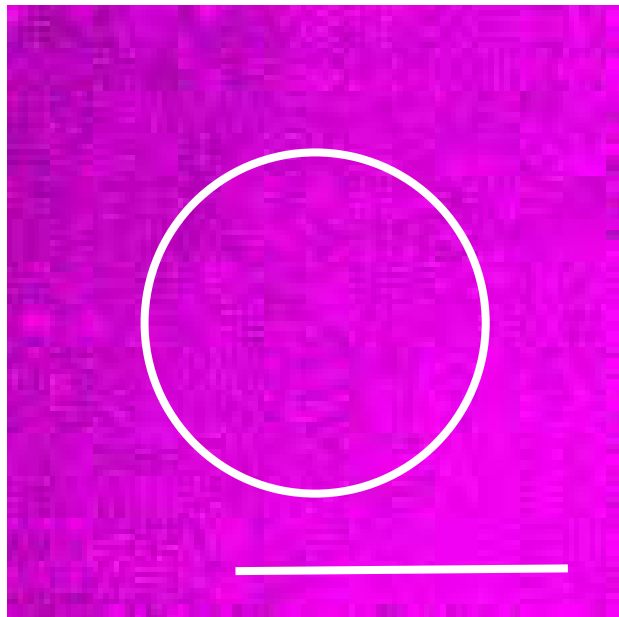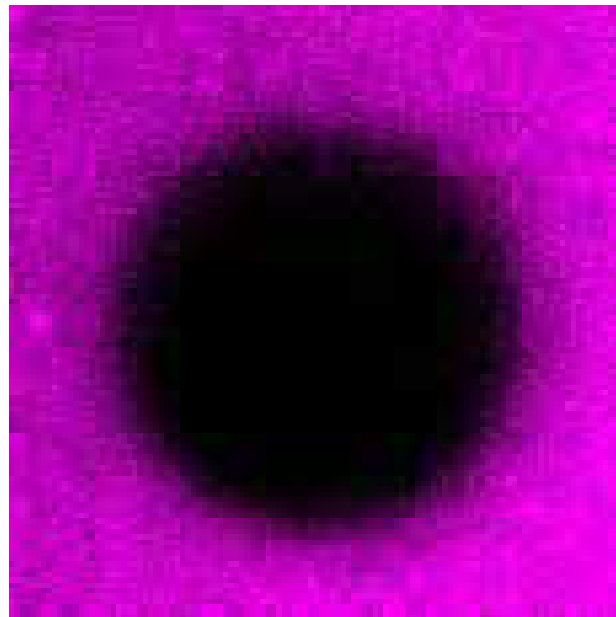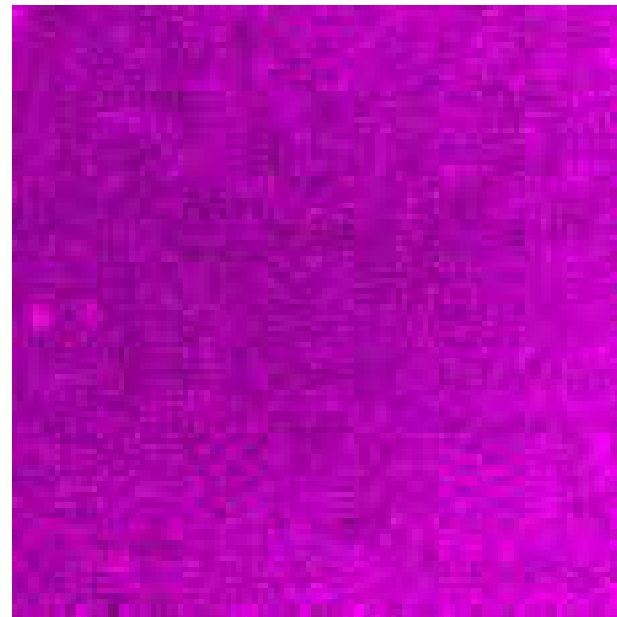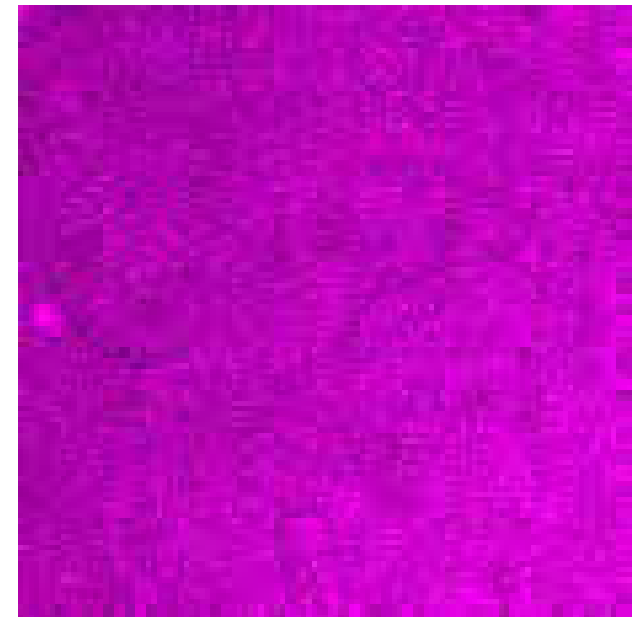

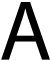

Supplement: supp [file elife-63349-supp-v1.zip › elife_poa_e63349_Figure_2_figure_supplement_2.pdf]

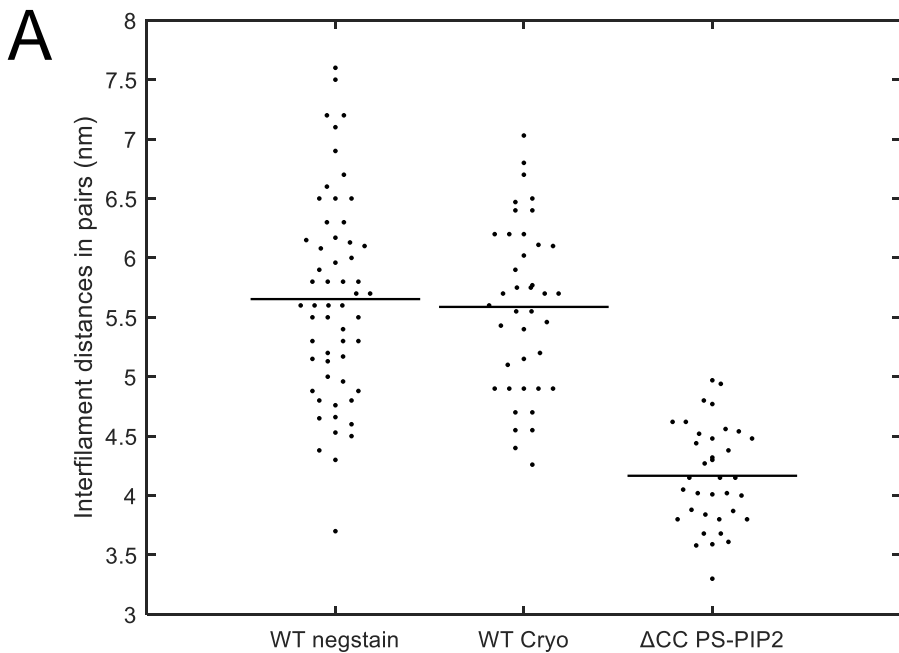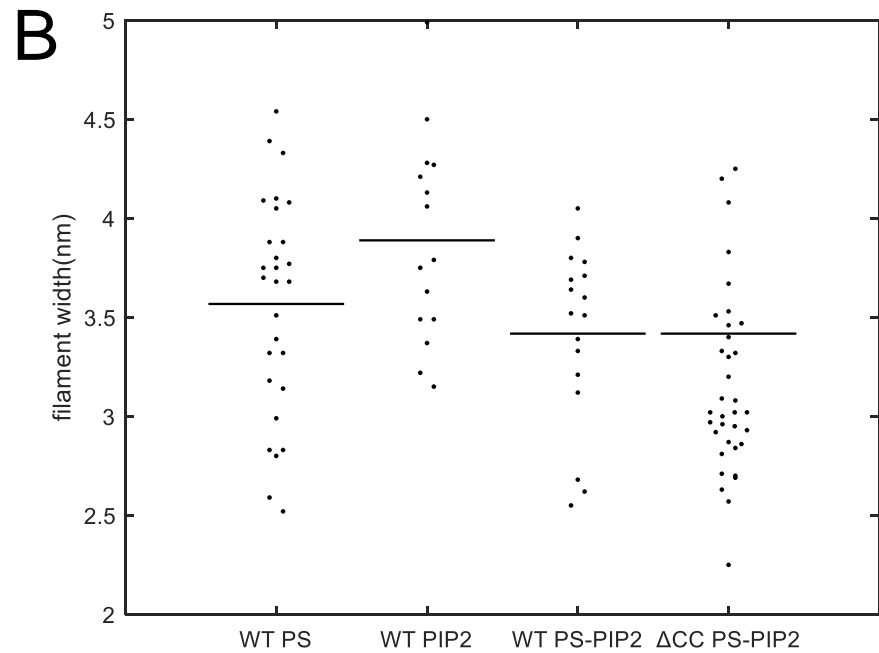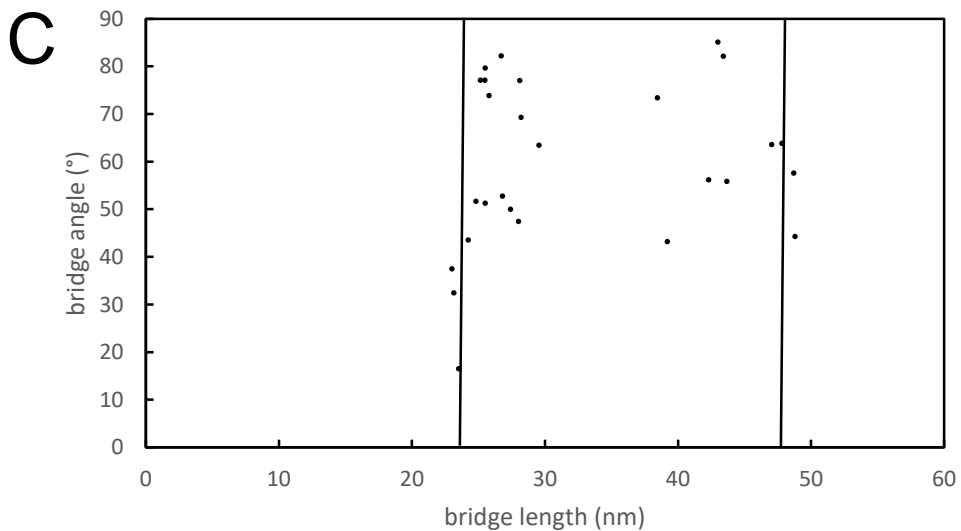

Supplement: supp [file elife-63349-supp-v1.zip › elife_poa_e63349_Figure_3_figure_supplement_1.pdf]

A

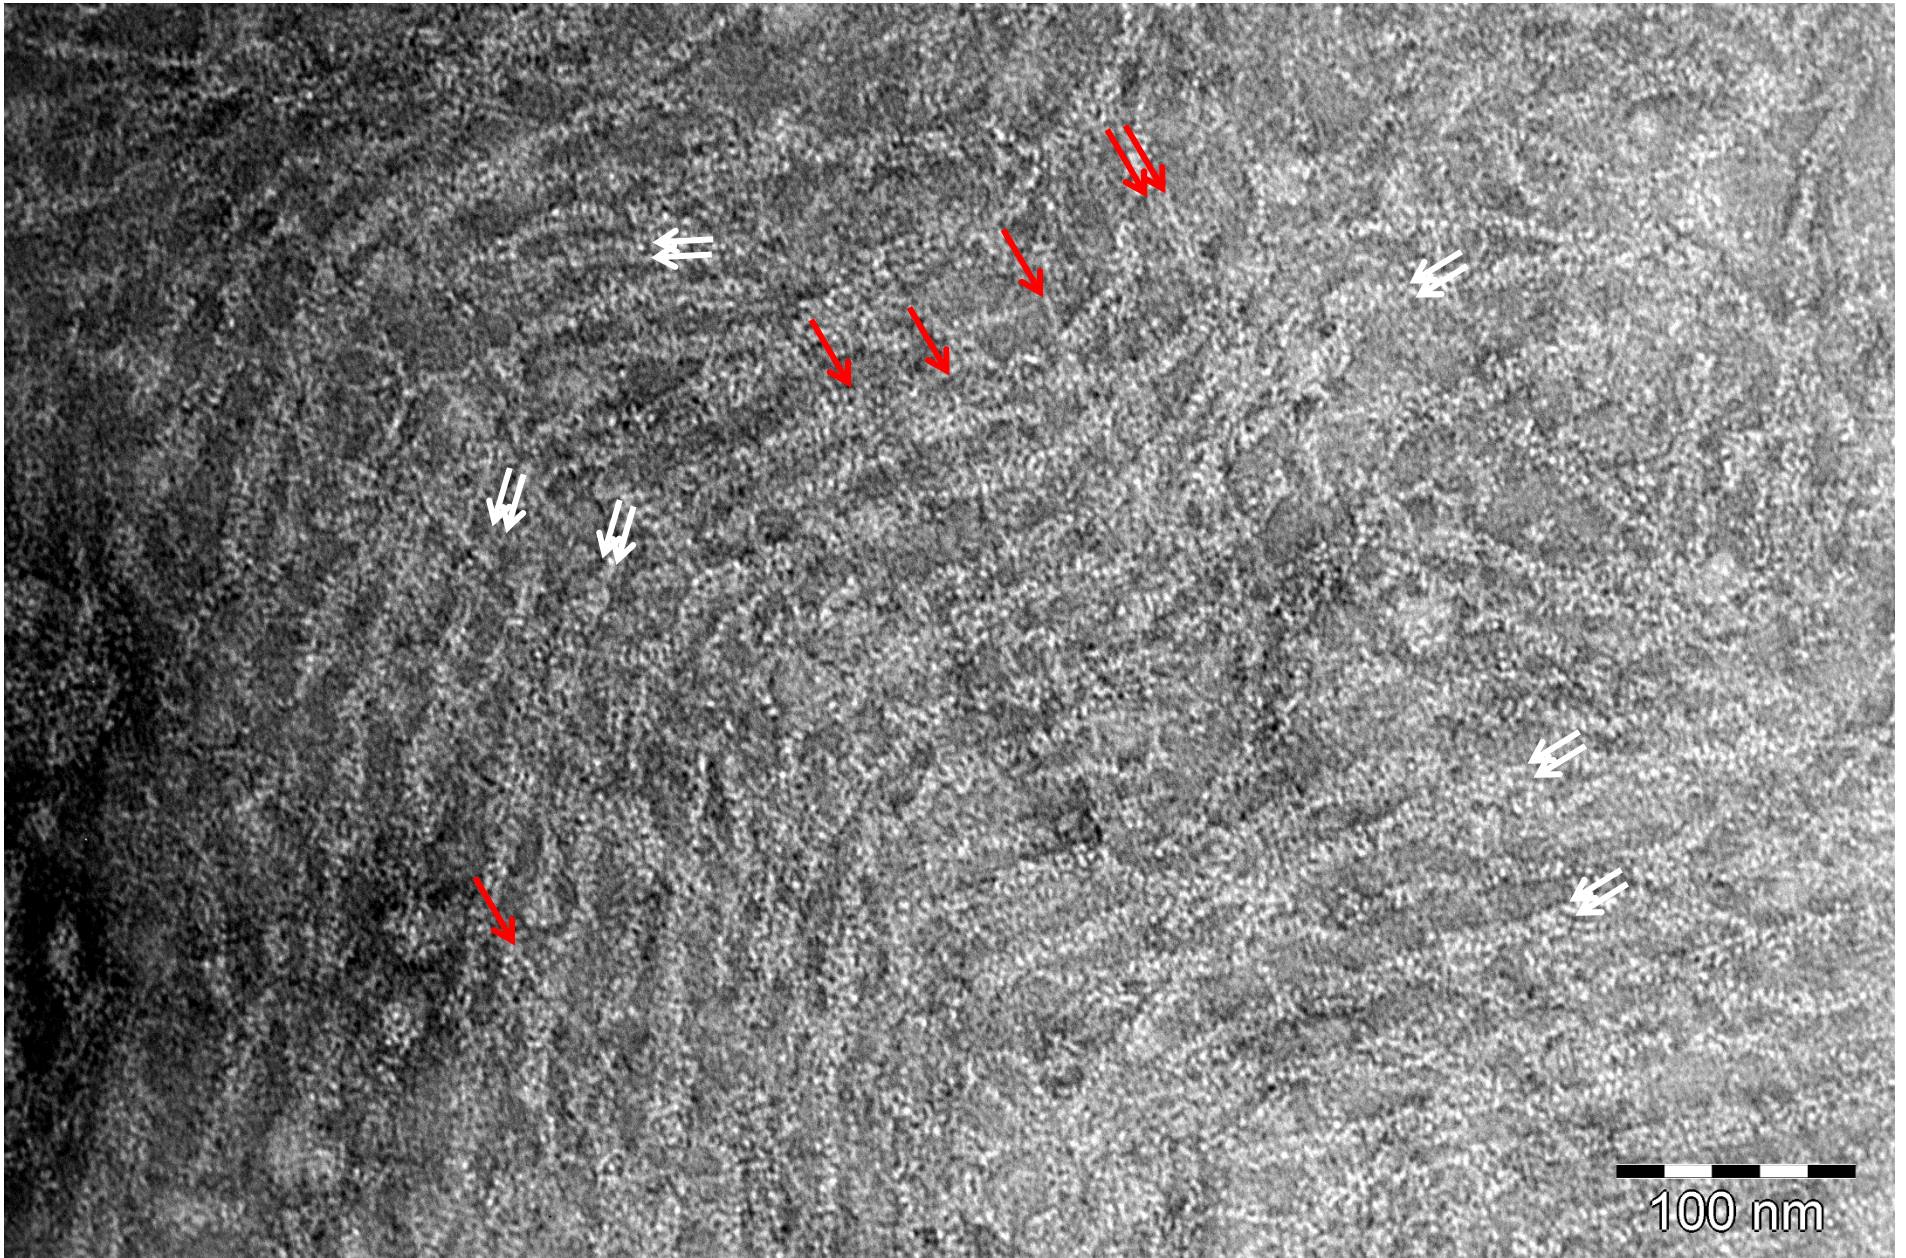

B

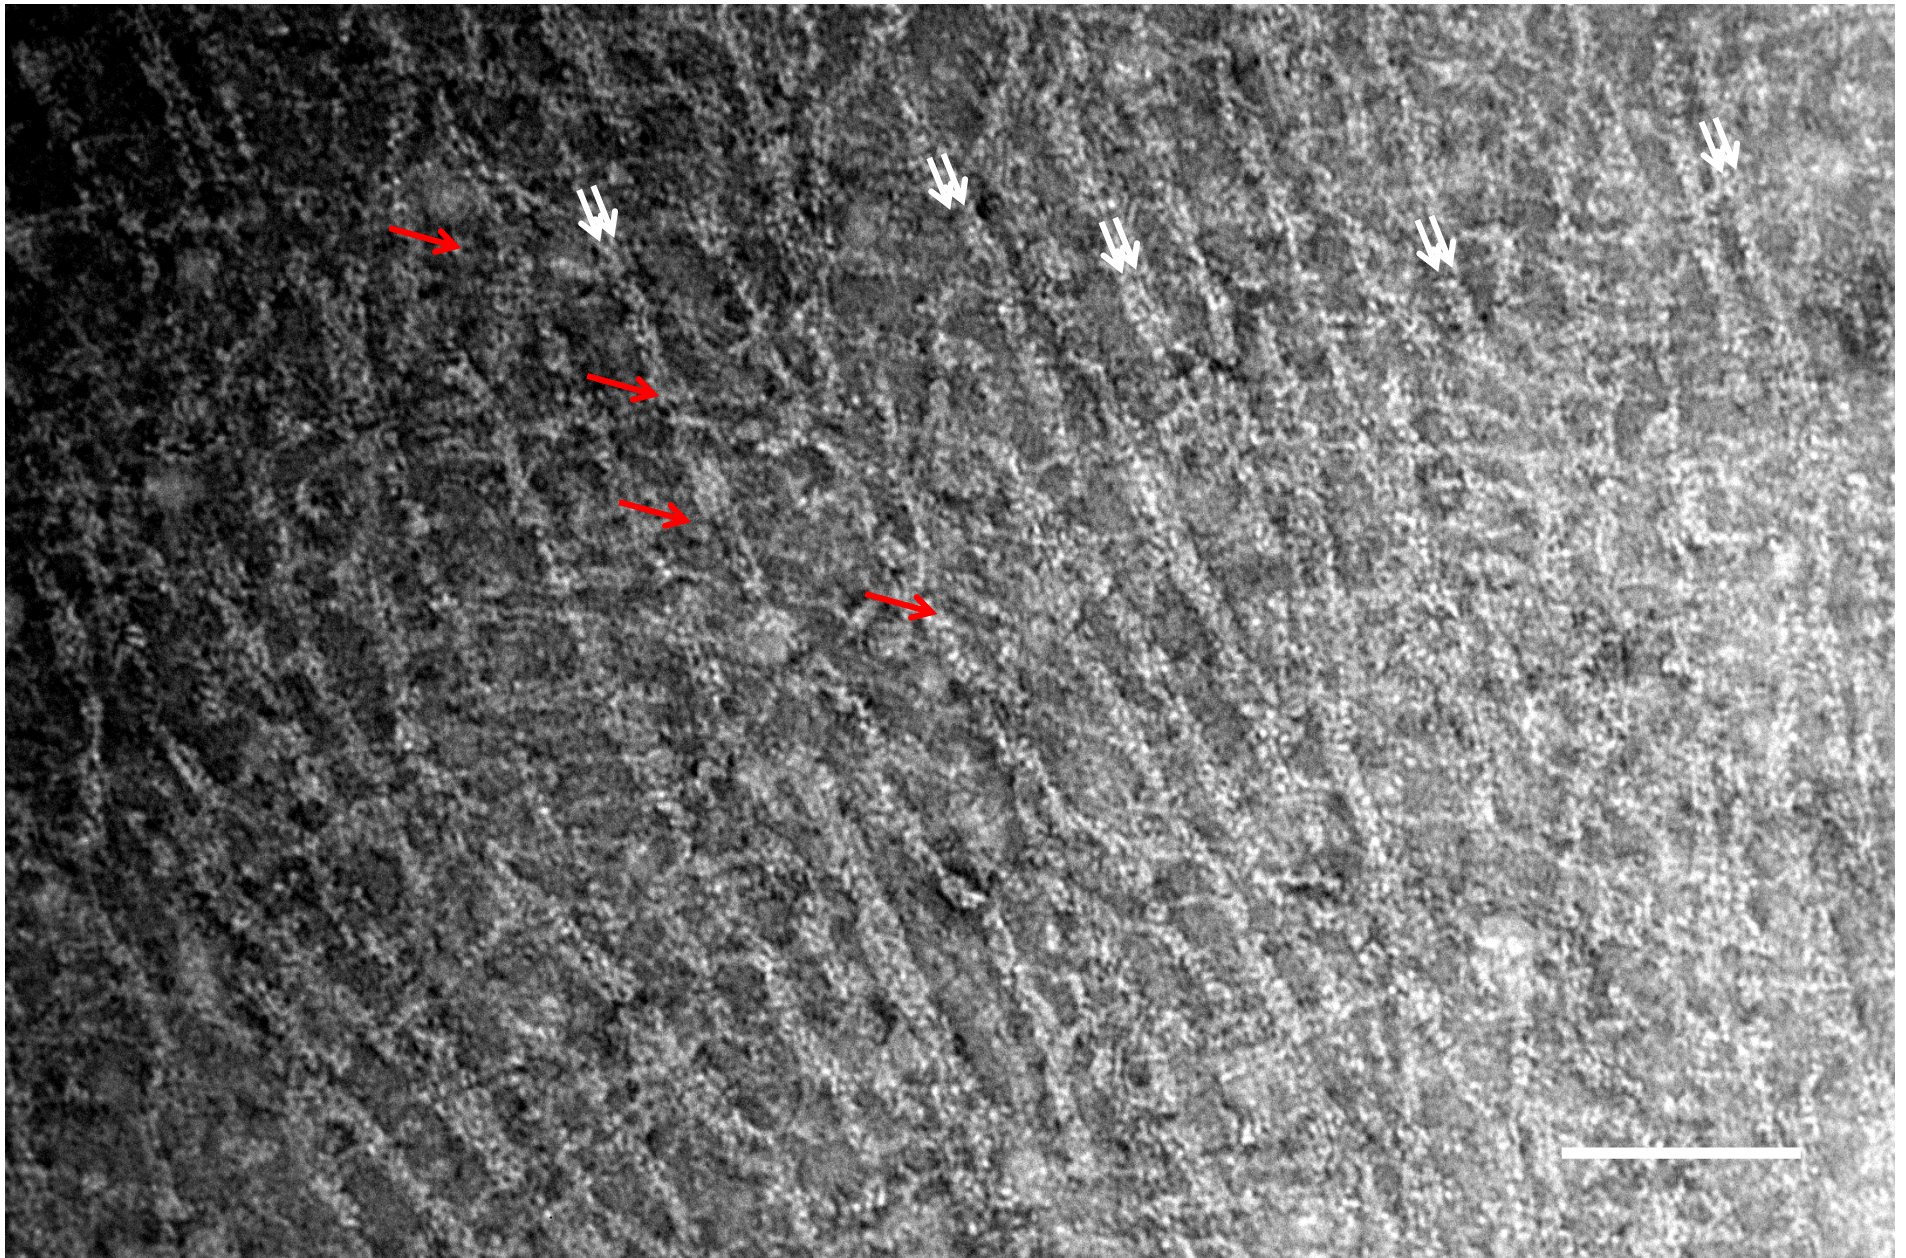

Supplement: supp [file elife-63349-supp-v1.zip › elife_poa_e63349_Figure_3_figure_supplement_2.pdf]

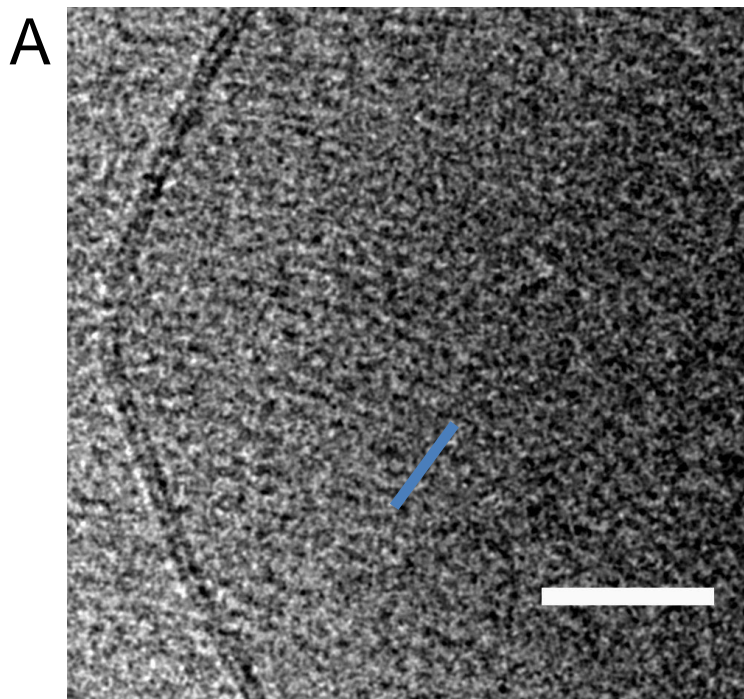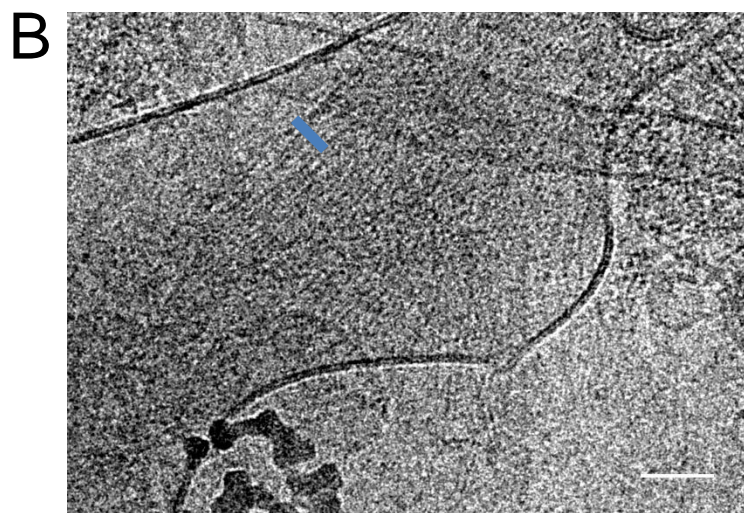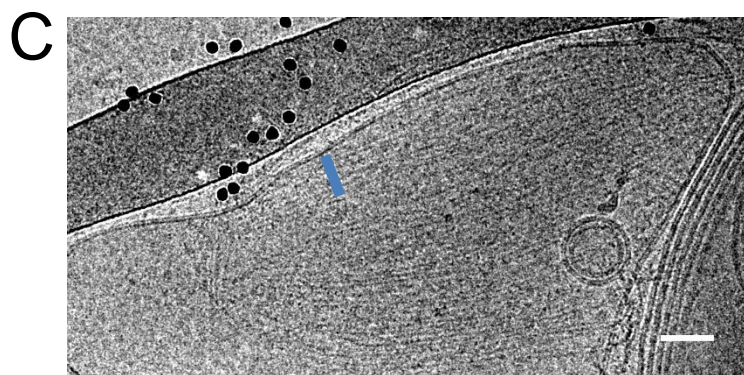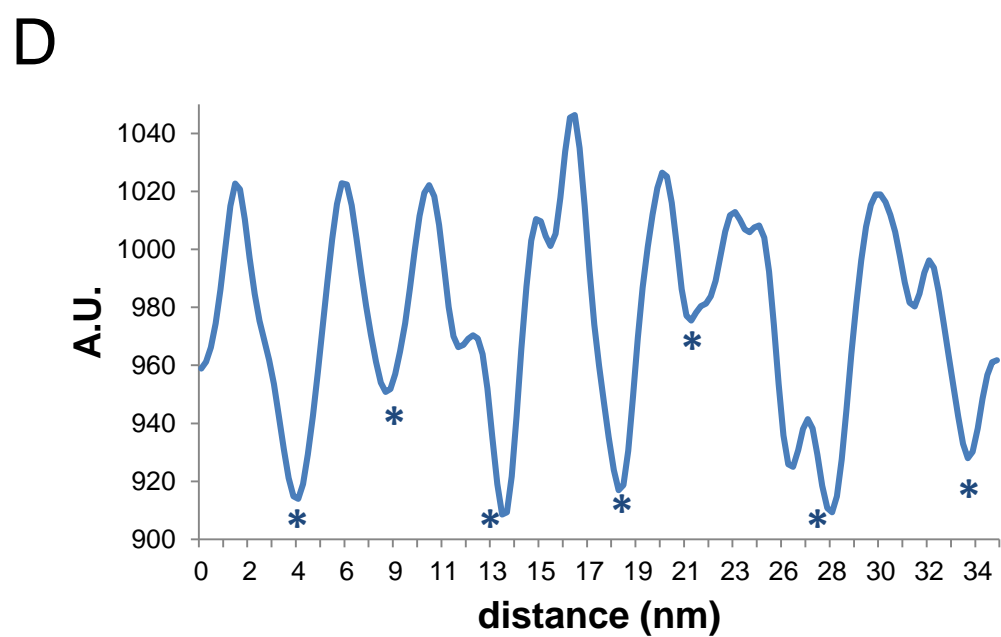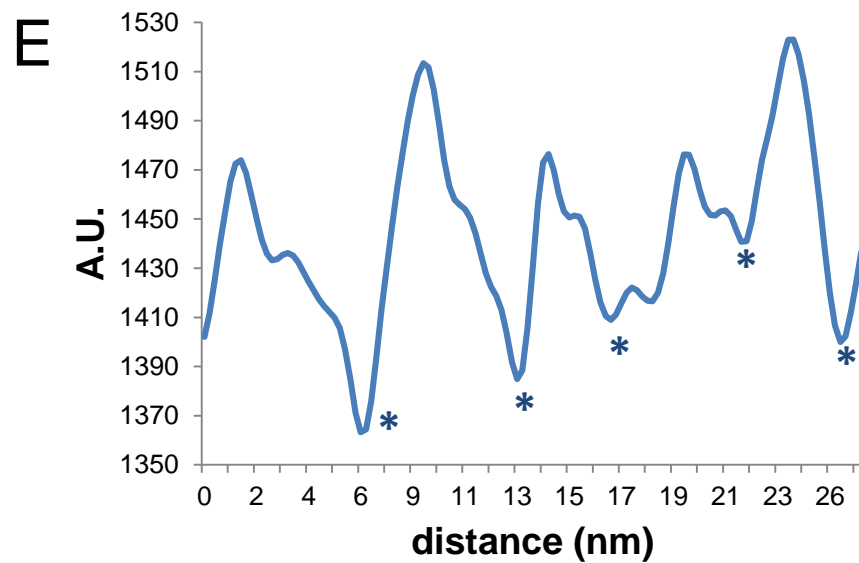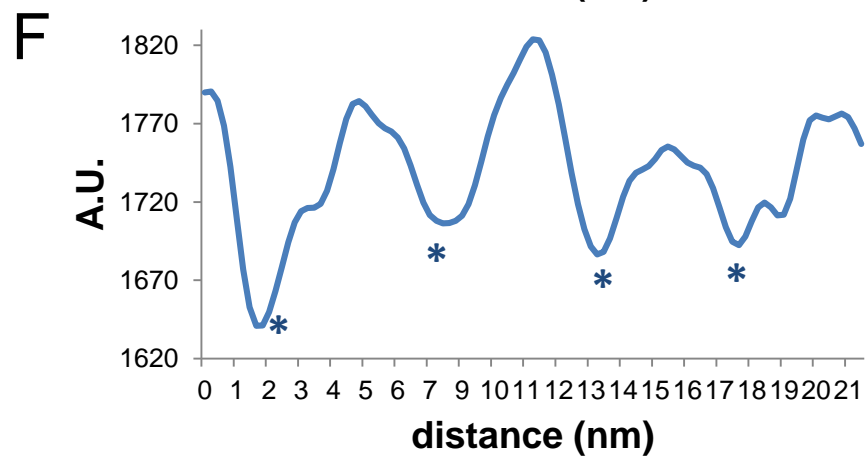

Supplement: supp [file elife-63349-supp-v1.zip › elife_poa_e63349_Figure_4_figure_supplement_1.pdf]

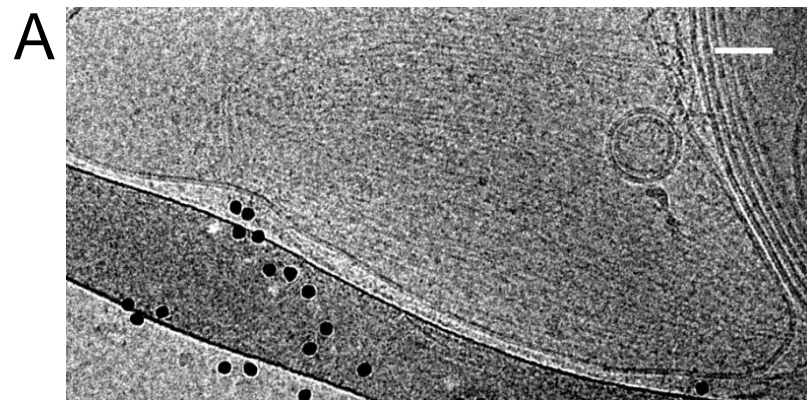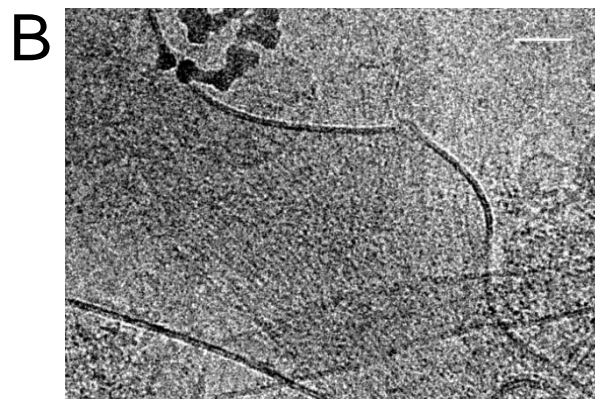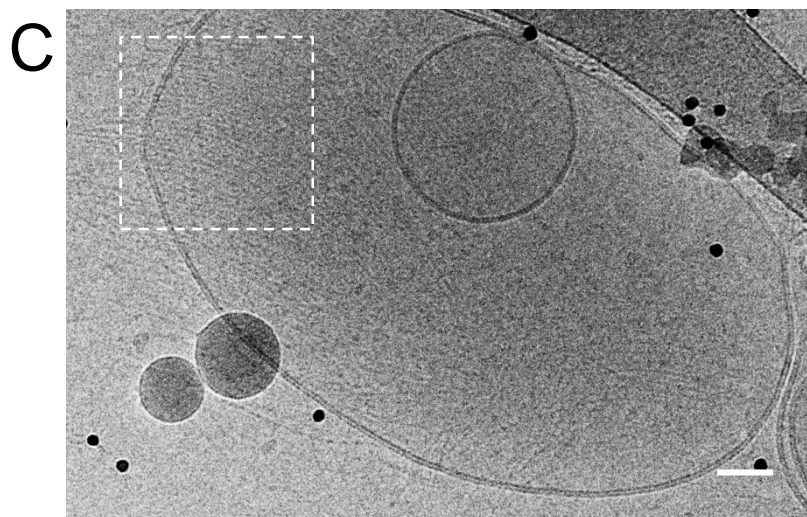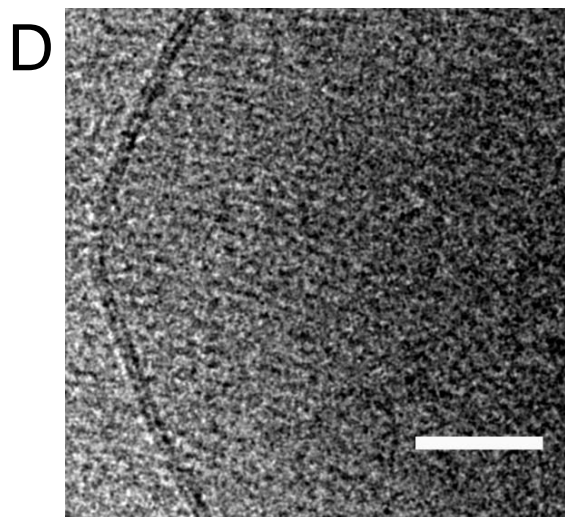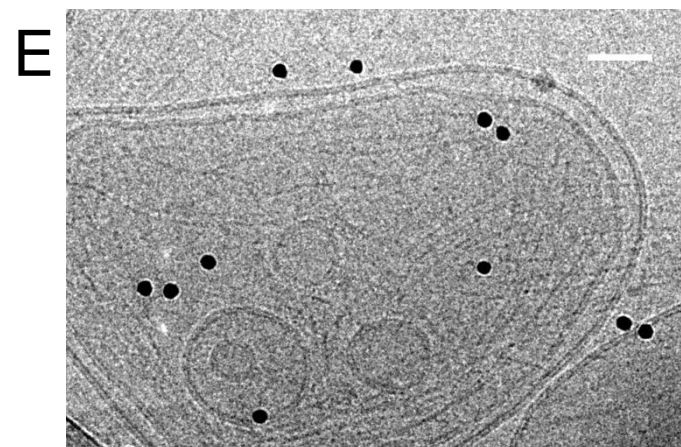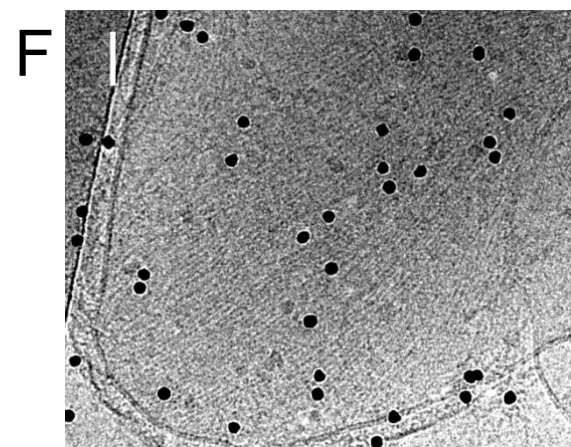

Supplement: supp [file elife-63349-supp-v1.zip › elife_poa_e63349_Figure_4_figure_supplement_2.pdf]

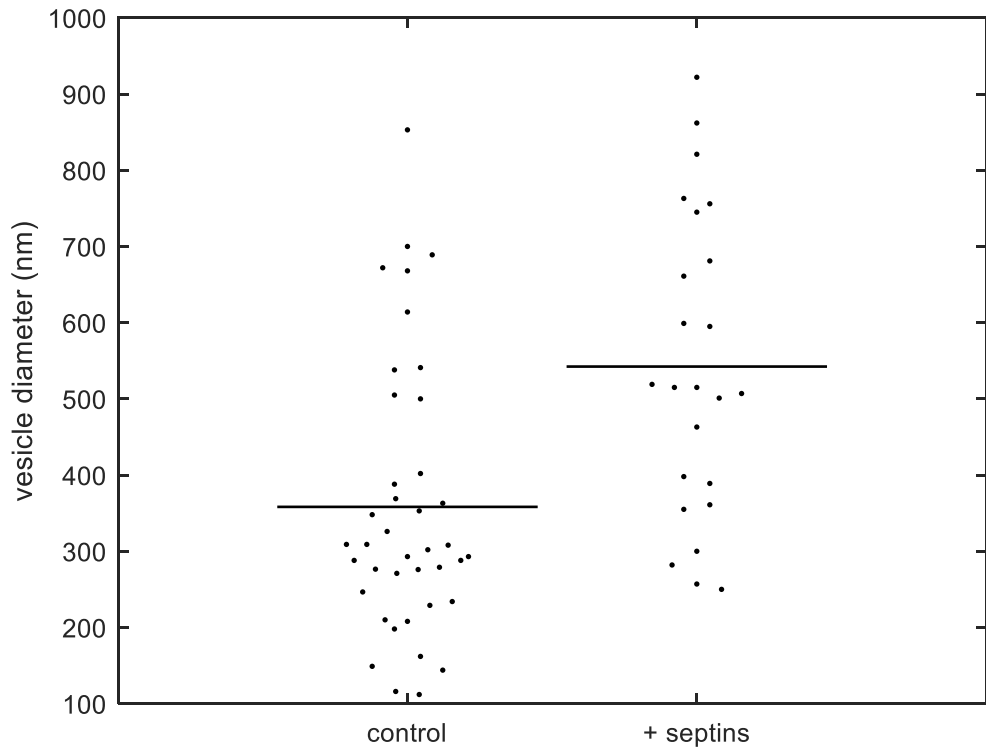

Supplement: supp [file elife-63349-supp-v1.zip › elife_poa_e63349_Figure_4_figure_supplement_3.pdf]

A

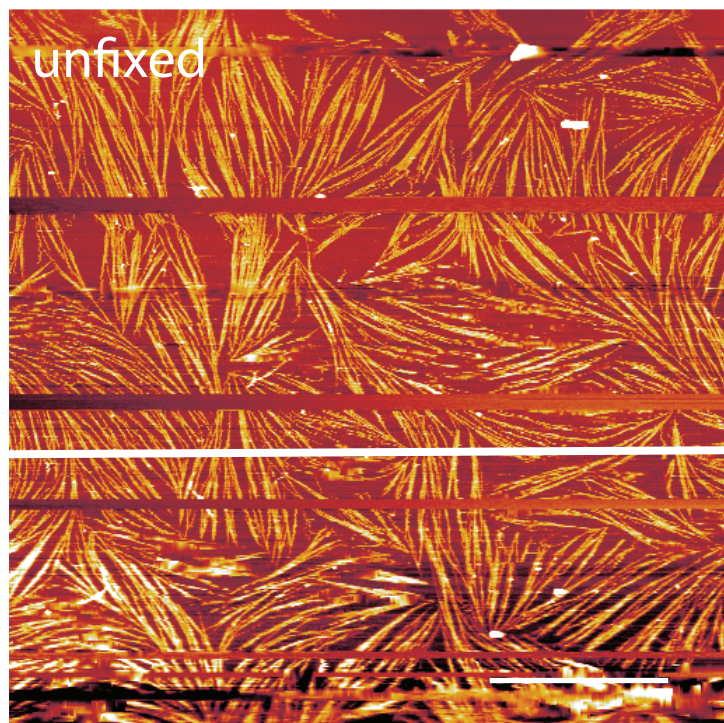

B

15 nm

0 nm

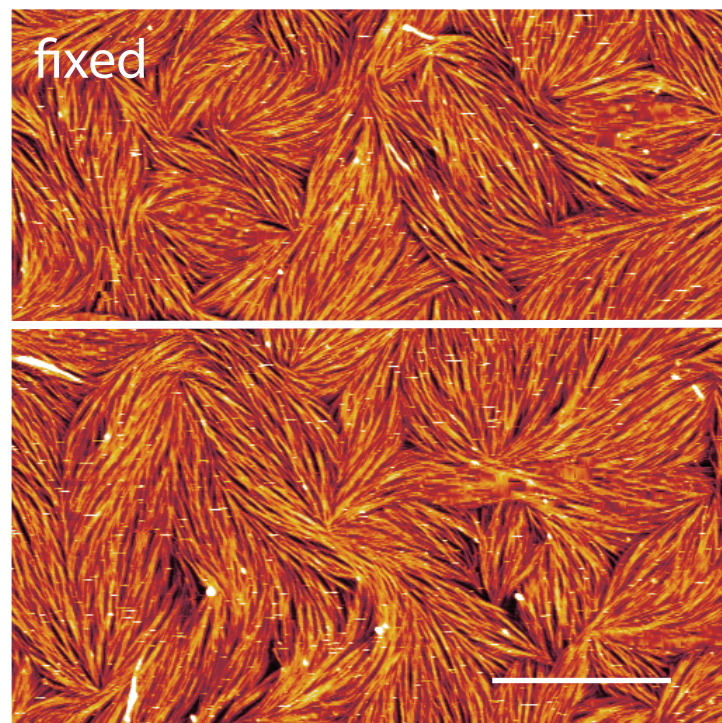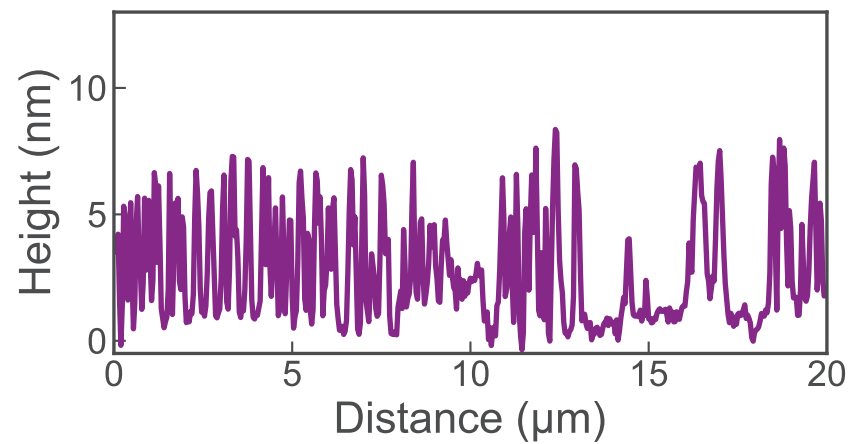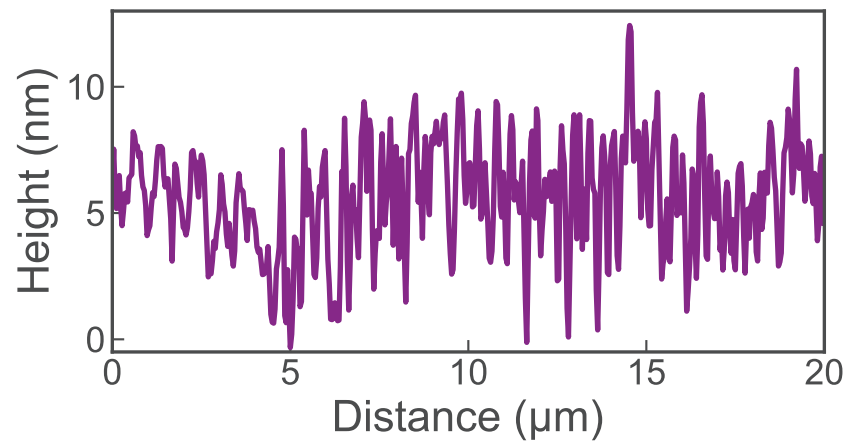

Supplement: supp [file elife-63349-supp-v1.zip › elife_poa_e63349_Figure_5_figure_supplement_2.pdf]

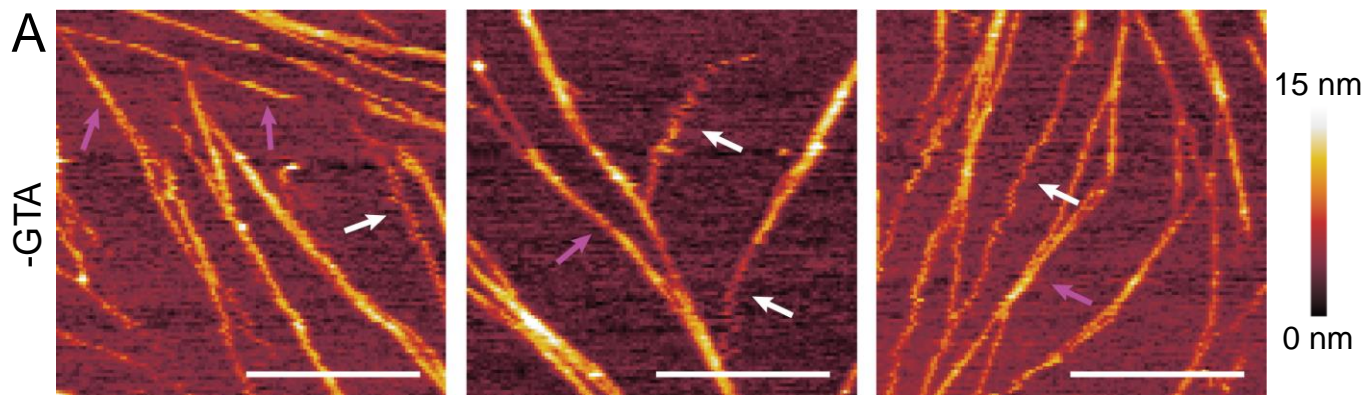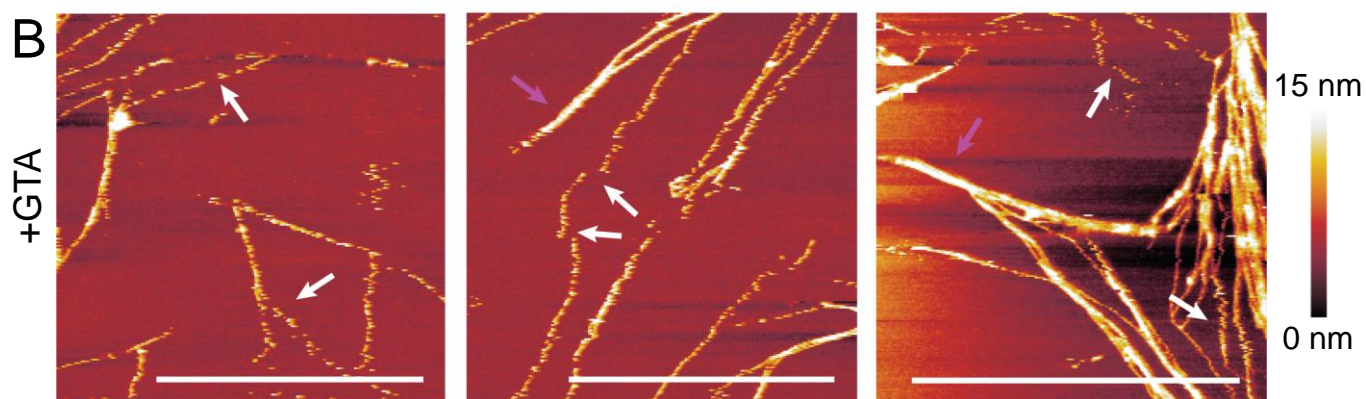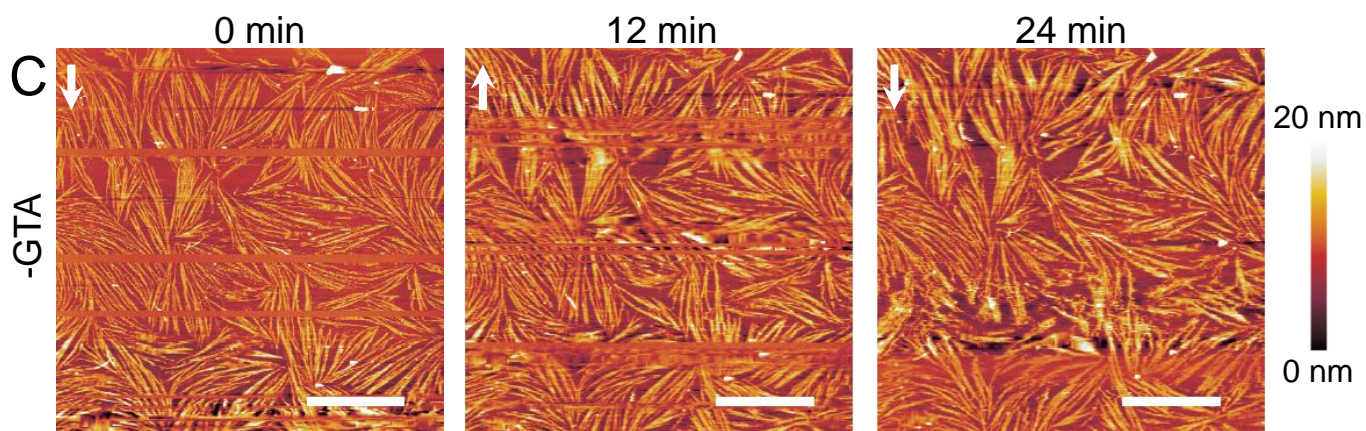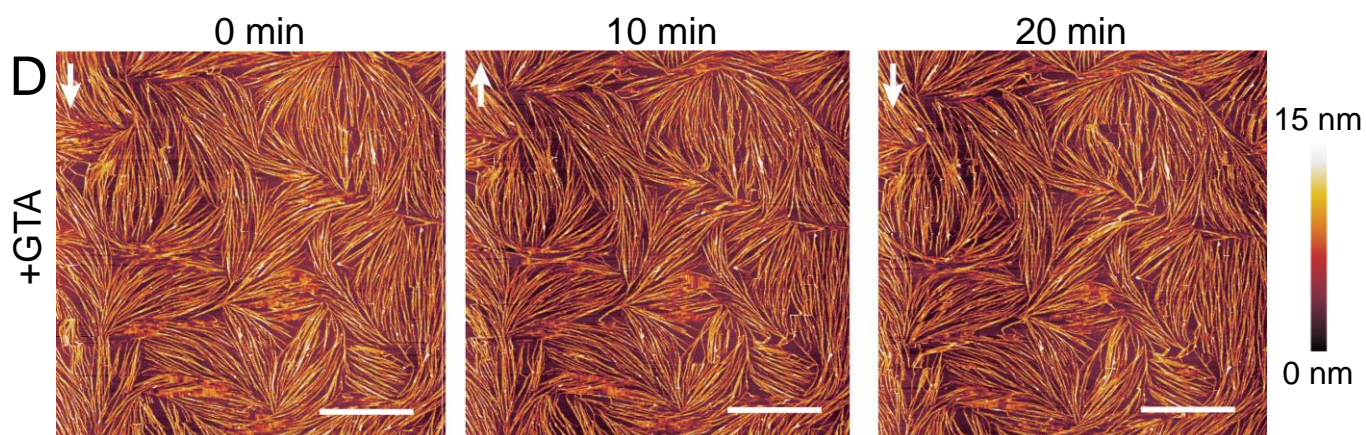

Supplement: supp [file elife-63349-supp-v1.zip › elife_poa_e63349_Figure_5_figure_supplement_3.pdf]

+ GTA

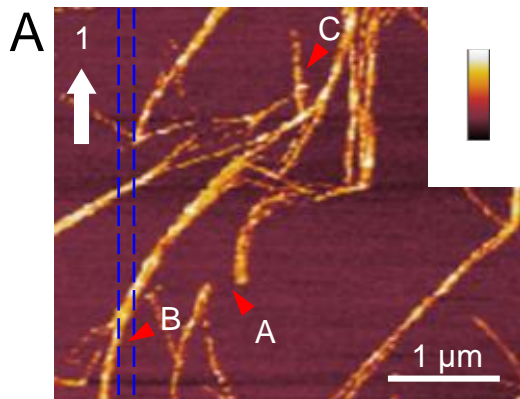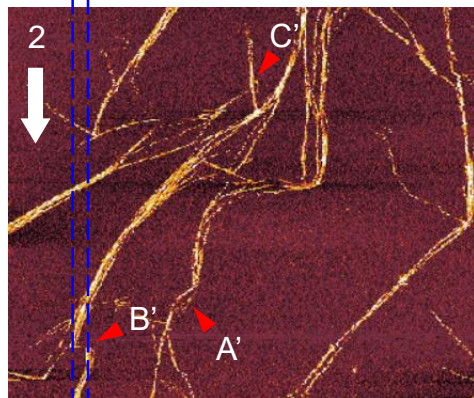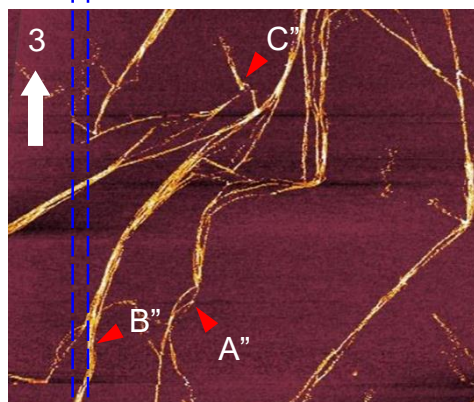

- GTA

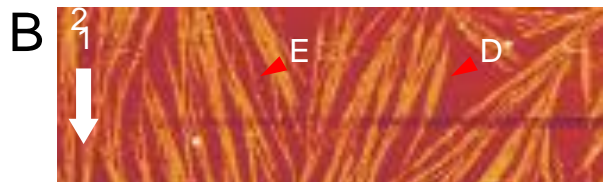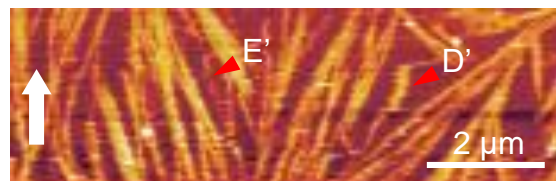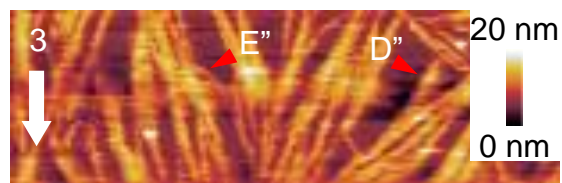

Supplement: supp [file elife-63349-supp-v1.zip › elife_poa_e63349_Figure_5_figure_supplement_4.pdf]

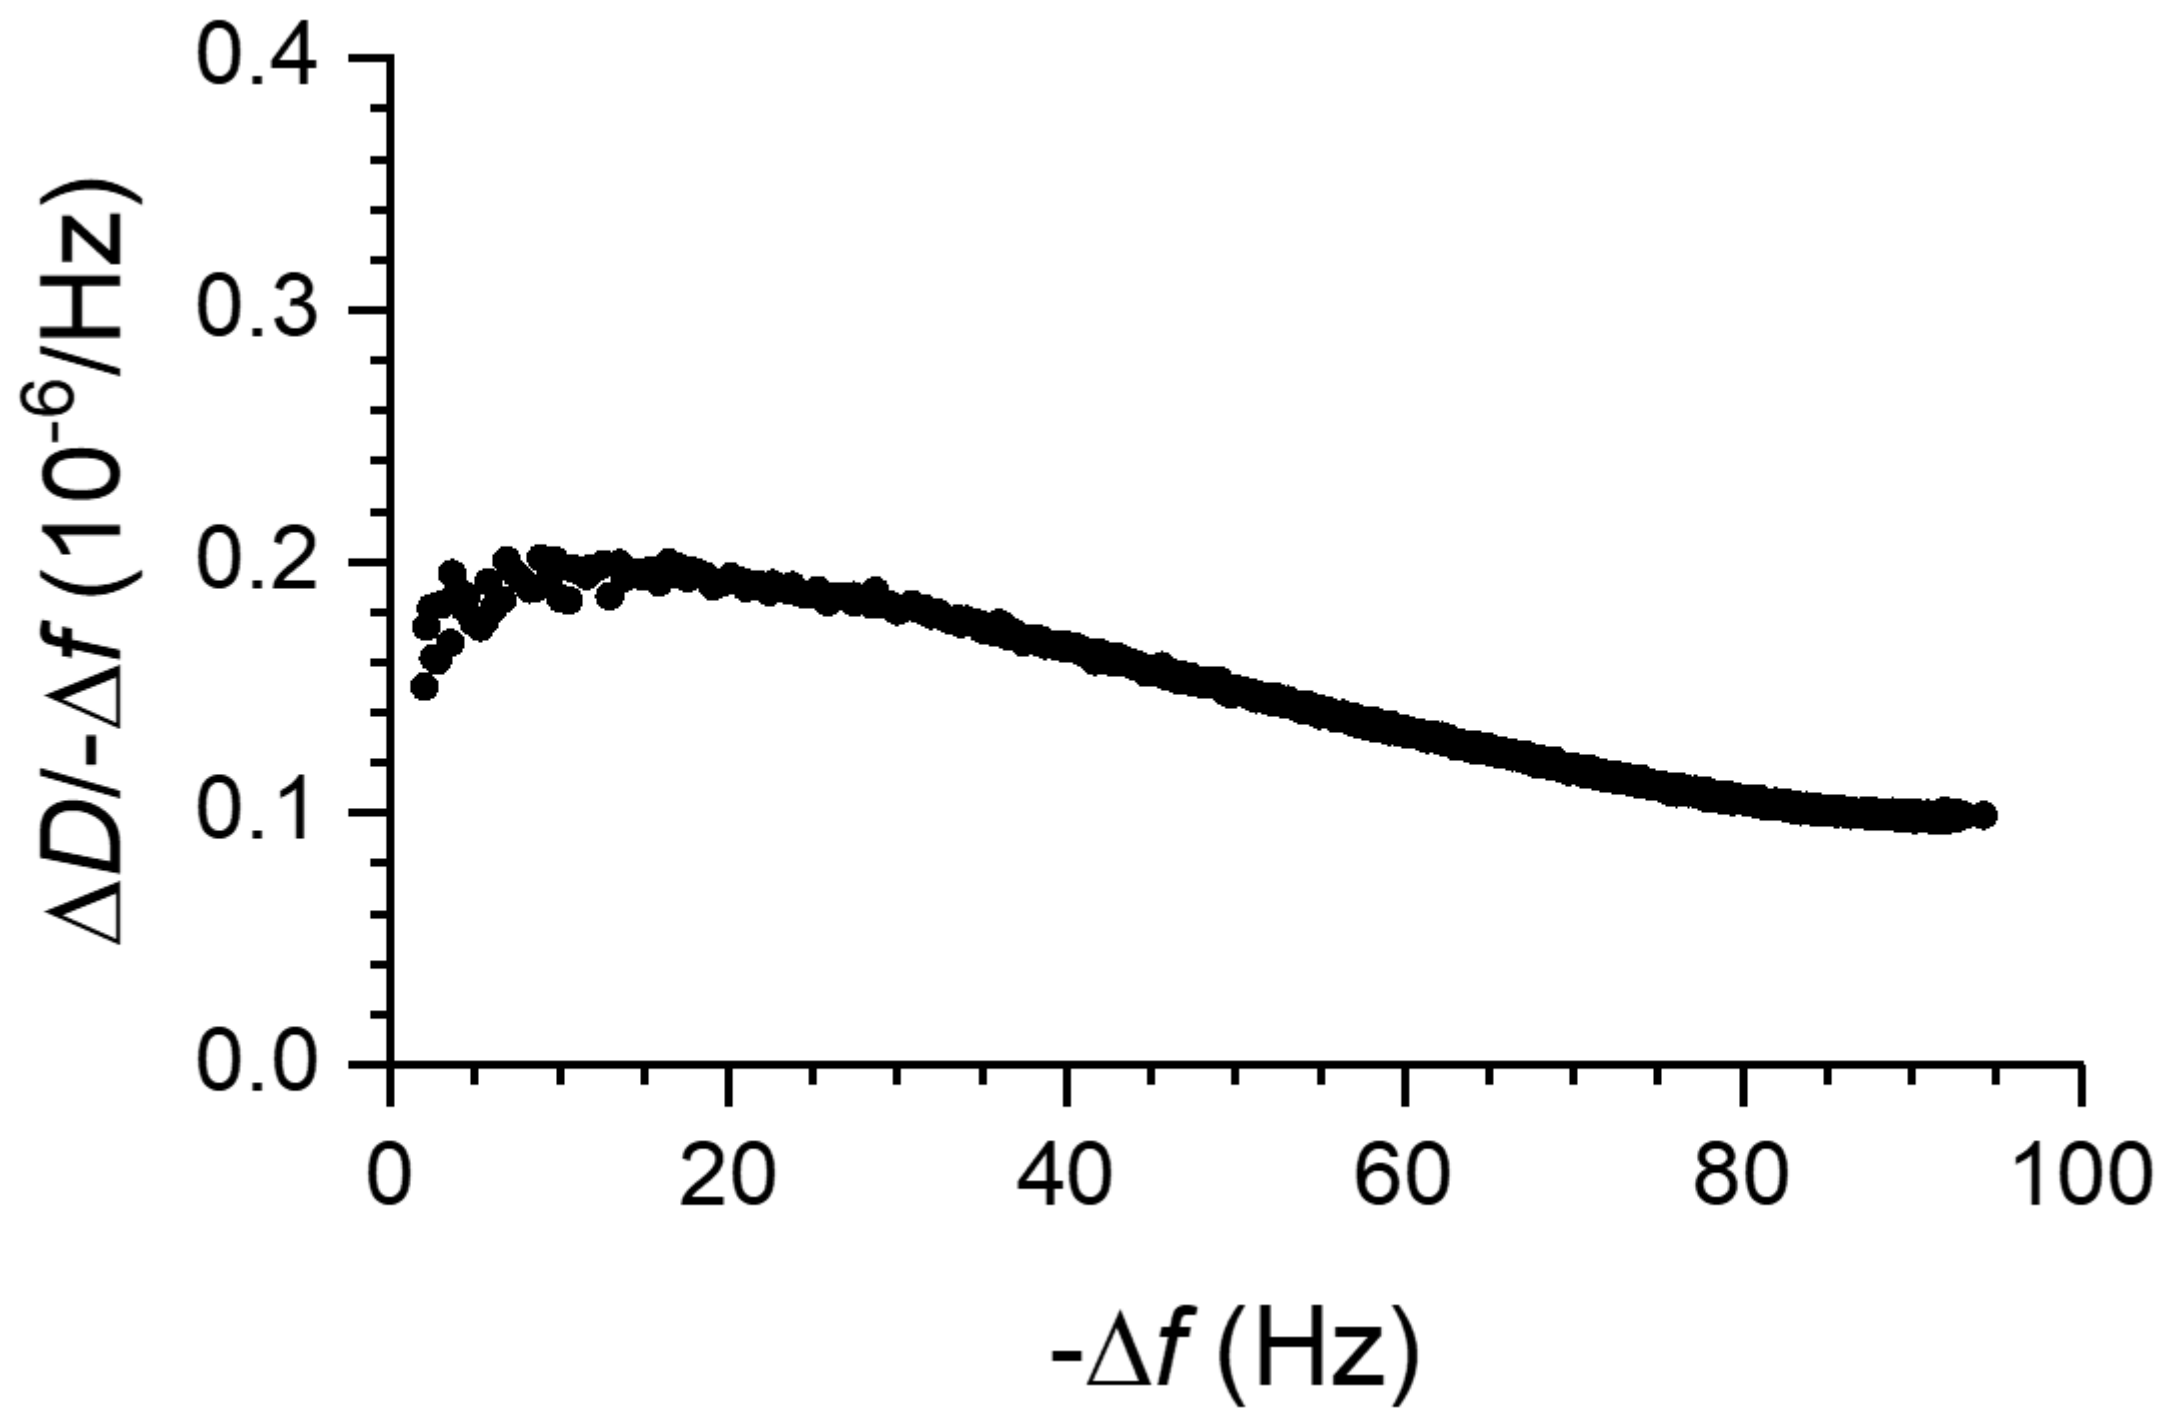

Supplement: supp [file elife-63349-supp-v1.zip › elife_poa_e63349_Figure_7_figure_supplement_1.pdf]

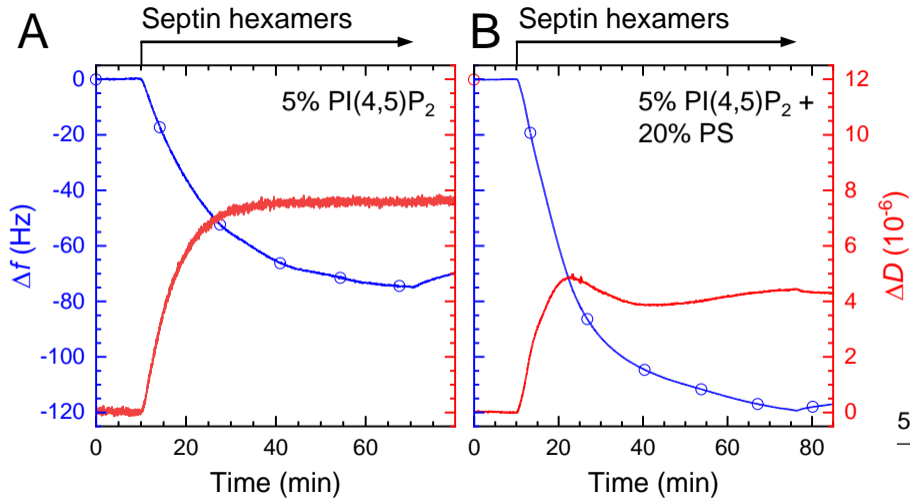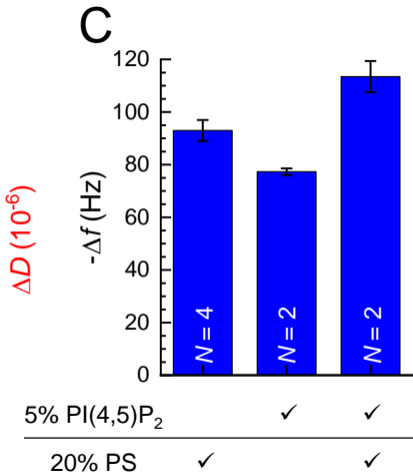

Supplement: supp [file elife-63349-supp-v1.zip › elife_poa_e63349_Figure_7_figure_supplement_2.pdf]

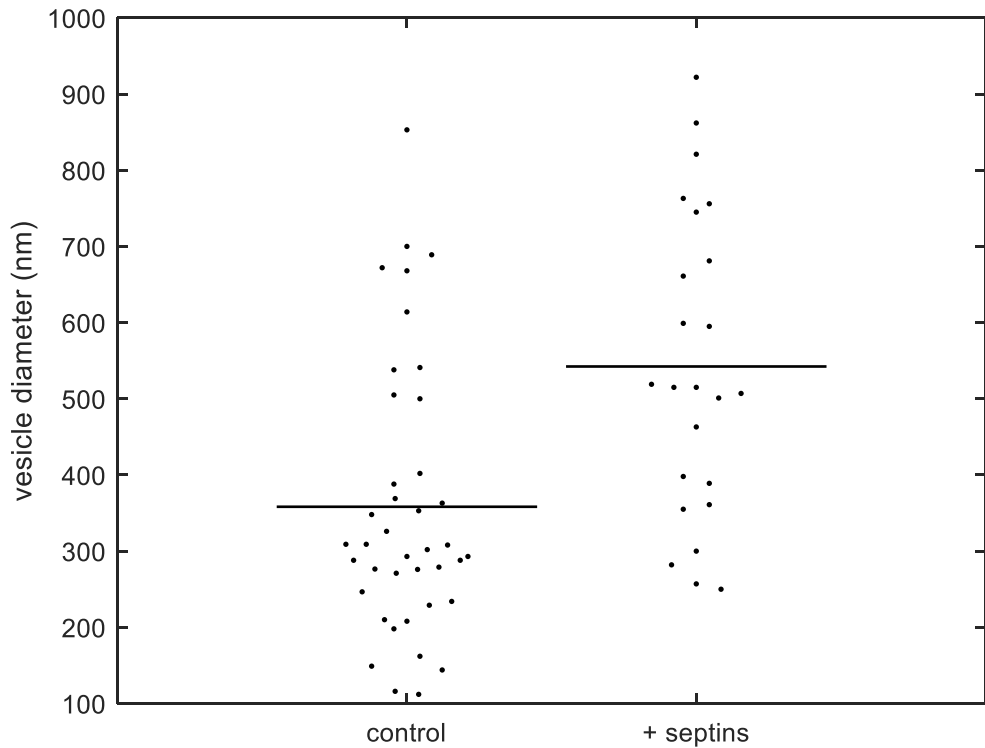

Supplement: supp [file elife-63349-supp-v1.zip › elife_poa_e63349_Figure_8_figure_supplement_1.pdf]
